# Supplementary material for: Construction and validation of m6A-related diagnostic model for psoriasis
Source: PeerJ. 2024 Feb 29;12:e17027. doi: 10.7717/peerj.17027 (PMC10909359; doi:10.7717/peerj.17027)
Supplement: Supplemental Information 1 [file peerj-12-17027-s001.xls]

## Sheet: Sheet1
ITEM TO CHECK	IMPORTANCE	CHECKLIST
EXPERIMENTAL DESIGN
Definition of experimental and control groups	E	Line 172-175; 186-189
Number within each group	E	Line 172; 186-187
Assay carried out by core lab or investigator's lab?	D	investigator's lab
Acknowledgement of authors' contributions	D
SAMPLE
Description	E	Line 194
Volume/mass of sample processed	D	40-60mg
Microdissection or macrodissection	E	macrodissection
Processing procedure	E	Line 194-195
If frozen - how and how quickly?	E	Line 194-195
If fixed - with what, how quickly?	E	Not fixed.
Sample storage conditions and duration (especially for FFPE samples)	E	Line 195
NUCLEIC ACID EXTRACTION
Procedure and/or instrumentation	E	Line 195-196. Skin tissues were grinded into power in the mortar filled with liquid nitrogen and transferred to a 1.5ml RNase DNase-free tube. Then 1 ml of Trizol Reagent was added into centrifuge tube. Vortexed the homogenized samples well and then incubated for 5 min at room temperature to completely diss ociate nucleoprotein complexes. After homogenization, phase separation was performed with …
Name of kit and details of any modifications	E	Line 195. We exactly followed the manufacture's protocol.
Source of additional reagents used	D	Chloroform, isopropyl alcohol, Ethanol (Provided by the laboratory); DEPC-Treated Water (Beyotime, China)
Details of DNase or RNAse treatment	E	Line 196-197 1ug of RNA was treated with 4ul of 4xDN Master Mix ( containing 0.08ul gDNA remover) in a 20ul final volume reaction. Digestion of DNA was achieved with 5 minutes incubation at 37℃.
Contamination assessment (DNA or RNA)	E	Reverse transcription controls (without enzyme) were performed in order to assess the existence of DNA in the RNA sample. For that purpose, RNA was processed as a normasample in the RT step, except that no reverse transcriptase was added to the reactionmixture.
Nucleic acid quantification	E	RNA concentration was assessed using spectrophotometry by measuring theabsorbance at 260 nm UV light.
Instrument and method	E	BioSpec-nano (SHIMADZU, Japan); Spectrophotometry
Purity (A260/A280)	D	1.8-2.0
Yield	D	RNA yield was calculated using spectrophotometry. The average yield was about 1200ng/ul for tissue RNA.
RNA integrity method/instrument	E	Agilent's 2100 bioanalyzer （Agilent Technologies, USA)
RIN/RQI or Cq of 3' and 5' transcripts	E	Not applicable
Electrophoresis traces	D
Inhibition testing (Cq dilutions, spike or other)	E	Considering the high quality of the starting RNA, the standard curve is considered to exclude the existence of reverse transcription activity or PCR inhibitors.
REVERSE TRANSCRIPTION
Complete reaction conditions	E	Line 196-197 Reverse transcription was carried out in 20ul reaction volume. Briefly, 1ug RNA templete, 4ul 4x ×DN Master Mix , 4ul 5xRT Master Ⅱ and 11ul nuclease-free water were mixed well, then the reaction mixtures were performed using the following conditions: 37°C for 5 min, 37°C for 15 min, followed by 98°C 5min and then held at 4°C.
Amount of RNA and reaction volume	E	Line 196 Amount of RNA: 1ug; Reaction volume: 20ul
Priming oligonucleotide (if using GSP) and concentration	E	Oligo dTprimer: 50pmol/20ul reaction system
Reverse transcriptase and concentration	E	Line 197 ReverTra Ace
Temperature and time	E	37°C for 5 min, 37°C for 15 min, followed by 98°C 5min and then held at 4°C
Manufacturer of reagents and catalogue numbers	D	Line 197.
Cqs with and without RT	D*
Storage conditions of cDNA	D	-20°C
qPCR TARGET INFORMATION
If multiplex, efficiency and LOD of each assay.	E	Generally, it can be verified by repeated experiments.
Sequence accession number	E	Table S2 in supplementary files. h-METTL3: NC_000014.9; m-METTL3:NC_000080.7; h-YTHDC2:NC_000005.10; m-YTHDC2: NC_000084.7; h-IGF2BP2: NC_000003.12; m-IGF2BP2: NC_000082.7; h-GAPDH: NC_000012.12; m-GAPDH NC_000072.7
Location of amplicon	D
Amplicon length	E	80-200bp
In silico specificity screen (BLAST, etc)	E	BLAST verified the specificity of primers
Pseudogenes, retropseudogenes or other homologs?	D
Sequence alignment	D
Secondary structure analysis of amplicon	D
Location of each primer by exon or intron (if applicable)	E	Not applicable
What splice variants are targeted?	E
qPCR OLIGONUCLEOTIDES
Primer sequences	E	Table S2 in supplementary files
RTPrimerDB Identification Number	D
Probe sequences	D**
Location and identity of any modifications	E	Design primers near the 3' end
Manufacturer of oligonucleotides	D
Purification method	D	PAGE
qPCR PROTOCOL
Complete reaction conditions	E	Line198-200. RT-qPCR was carried out using FastStart Universal SYBR Green Master(ROX) in 20ul reaction volumes. In brief, each reaction was comprised of 2ul of the cDNA solution, 10ul of SYBRGreen Master, 1.2ul of primers and 6.8ul of nuclease-free water. All RT-qPCR reactions were performed on C1000 TouchTM Thermal Cycler (Bio-Rad, USA), using the following conditions: 95°C for 10 min, followed …
Reaction volume and amount of cDNA/DNA	E	Reaction volume: 20ul; amount of cDNA: 2ul.
Primer, (probe), Mg++ and dNTP concentrations	E	0.3uM Primers; 2 mM MgCl2; 0.2 mM dNTP
Polymerase identity and concentration	E	FastStart Taq
Buffer/kit identity and manufacturer	E	Line 199
Exact chemical constitution of the buffer	D
Additives (SYBR Green I, DMSO, etc.)	E	SYBR Green I
Manufacturer of plates/tubes and catalog number	D	PCR Strip Tubes (PCR-0208-C) and PCR Strip Caps (PCR-2CP-RT-C), both provided by Axygen.
Complete thermocycling parameters	E	Line 200
Reaction setup (manual/robotic)	D
Manufacturer of qPCR instrument	E	Line 199
qPCR VALIDATION
Evidence of optimisation (from gradients)	D
Specificity (gel, sequence, melt, or digest)	E	Specificity was confirmed by melt curve analyses.
For SYBR Green I, Cq of the NTC	E	The signal of the amplification plot was very late (Cq>38)
Standard curves with slope and y-intercept	E	h-METTL3:y=-3.4971x+37.498; m-METTL3:y=-3.4918x+37.48; h-YTHDC2:y=-3.3474x+38.886; m-YTHDC2:y=-3.4455x+39.399; h-IGF2BP2:y=-3.4234x+34.246; m-IGF2BP2: y=-3.4298x+38.714; h-GAPDH: y=-3.4423x+27.568; m-GAPDH:y=-3.3547x+27.326
PCR efficiency calculated from slope	E	h-METTL3:93.18%; m-METTL3:93.37%; h-YTHDC2:98.94%; m-YTHDC2:95.09%; h-IGF2BP2:95.93%; m-IGF2BP2: 95.69%; h-GAPDH: 95.21%; m-GAPDH:98.65%
Confidence interval for PCR efficiency or standard error	D
r2 of standard curve	E	h-METTL3:0.9847; m-METTL3:0.9874; h-YTHDC2:0.9987; m-YTHDC2:0.9913; h-IGF2BP2:0.9926; m-IGF2BP2: 0.9971; h-GAPDH:0.9977; m-GAPDH:0.9877
Linear dynamic range	E	linear dynamic range was considered taking into account the linearity of thestandard curves; from 1/10 dilution of cDNA to 1/1000 dilution.
Cq variation at lower limit	E
Confidence intervals throughout range	D
Evidence for limit of detection	E
If multiplex, efficiency and LOD of each assay.	E	Not applicable
DATA ANALYSIS
qPCR analysis program (source, version)	E	Bio-Rad CFX Manager 3.1(USA)
Cq method determination	E	Raw data in supplementary files. The threshold was defined as the fractiona cycle number at which the fluorescenceexceeded the given threshold and was calculated using Bio-Rad CFX Manager 3.1 using the automatic baseline setting.
Outlier identification and disposition	E	If the amplification curve, melt curve and cq value are abnormal, it is necessary to explore the experimental conditions again.
Results of NTCs	E	The signal of the amplification plot was very late (Cq>38) and therefore there was a high Cq value difference between the negative control and all the cDNA samples.
Justification of number and choice of reference genes	E	Figure 11. GAPDH
Description of normalisation method	E	Line 201
Number and concordance of biological replicates	D
Number and stage (RT or qPCR) of technical replicates	E	RT-qPCR reactions were performed in triplicate.
Repeatability (intra-assay variation)	E	Mean standard deviation of triplicates: less than 0.10
Reproducibility (inter-assay variation, %CV)	D
Power analysis	D
Statistical methods for result significance	E	Line 205-207
Software (source, version)	E	Line 204-205
Cq or raw data submission using RDML	D
Table 1. MIQE checklist for authors, reviewers and editors. All essential information (E) must be submitted with the manuscript. Desirable
information (D) should be submitted if available. If using primers obtained from RTPrimerDB, information on qPCR target, oligonucleotides,
protocols and validation is available from that source.
*: Assessing the absence of DNA using a no RT assay is essential when first extracting RNA. Once the sample has been validated as
RDNA-free, inclusion of a no-RT control is desirable, but no longer essential.
**: Disclosure of the probe sequence is highly desirable and strongly encouraged. However, since not all commercial pre-designed assay
vendors provide this information, it cannot be an essential requirement. Use of such assays is advised against.
