# Supplementary material for: Construction and validation of m6A-related diagnostic model for psoriasis
Source: PeerJ. 2024 Feb 29;12:e17027. doi: 10.7717/peerj.17027 (PMC10909359; doi:10.7717/peerj.17027)
Supplement: Supplemental Information 4 [file peerj-12-17027-s004.xlsx]

## Sheet: GSE30999-m6A-sig-exp
ID_REF	Gene.symbol	FDR	P.Value	logFC	NL	LS	NL	LS	NL	LS	NL	LS	NL	LS	NL	LS	LS	NL	LS	NL	LS	NL	LS	NL	LS	NL	LS	LS	NL	LS	NL	NL	LS	NL	LS	NL	LS	NL	LS	NL	LS	NL	LS	NL	LS	NL	LS	NL	LS
					GSM767976	GSM767977	GSM767978	GSM767979	GSM767980	GSM767981	GSM767982	GSM767983	GSM767984	GSM767985	GSM767986	GSM767987	GSM767988	GSM767989	GSM767990	GSM767991	GSM767992	GSM767993	GSM767994	GSM767995	GSM767996	GSM767997	GSM767998	GSM767999	GSM768000	GSM768001	GSM768002	GSM768003	GSM768004	GSM768005	GSM768006	GSM768007	GSM768008	GSM768009	GSM768010	GSM768011	GSM768012	GSM768013	GSM768014	GSM768015	GSM768016	GSM768017	GSM768018	GSM768019	GSM768020
1553101_a_at	ALKBH5	0.0486	0.0216	-0.35	10.02	9.12	10.64	10.28	10.79	9.85	10.12	9.71	10.08	9.67	10.26	10.07	10.59	10.64	9.05	9.77	9.47	9.92	10.18	5.75	8.38	9.91	9.25	9.55	9.41	9.05	10.45	10.45	8.94	10.56	9.17	9.58	9.49	10.1	10.05	10.35	9.35	10.14	10.08	8.45	8.58	9.85	7.53	8.51	9.54
1555760_a_at	RBM15	0.000178	5.18e-05	0.926	9.59	9.13	8.26	7.87	9.62	9.92	8.77	9.57	8.24	9.28	9.36	8	10.06	8.45	8.37	8.73	9.25	9.38	10.11	7.68	8.36	8.87	9.02	7.44	8.01	9.07	9.46	9.09	8.2	3.05	8.87	8.57	8.15	8.62	9.62	8.6	8.99	7.75	9.9	7.71	7.05	3.77	7.09	4.17	9.39
1564053_a_at	YTHDF3	1.38e-06	3.07e-07	0.36	2.19	3.55	2.51	2.95	2.79	4.74	2.15	3.69	2.13	3.71	2.28	3.2	2.11	2.14	2.84	2.09	2.19	2.26	3.74	2.15	2.17	2.54	2.16	2.16	2.14	3.56	2.14	2.13	2.14	3.62	2.72	2.1	2.09	2.14	4.12	2.08	2.89	2.12	4.38	2.12	2.23	2.11	2.15	2.1	3.27
203820_s_at	IGF2BP3	0.00252	0.000871	0.22	5.56	5.58	5.52	5.29	5.58	5.91	5.41	5.79	5.25	5.63	4.65	5.52	5.57	4.6	5.66	6.28	6.18	5.55	5.79	4.37	5.93	5.58	5.64	5.55	5.61	5.58	5.86	5.57	5.59	5.24	5.62	5.63	5.61	5.58	5.47	4.78	5.76	7.32	5.59	6.01	6.39	6.48	6.02	5.37	5.56
205292_s_at	HNRNPA2B1	6.7e-11	9.01e-12	0.178	14.17	14.4	14.38	14.42	14.64	14.54	14.4	14.48	14.57	14.48	14.35	14.42	14.45	14.48	14.53	14.37	14.47	14.48	14.6	13.99	14.43	14.29	14.59	14.44	14.23	14.47	14.24	14.33	14.26	14.27	14.34	14.09	14.21	14.21	14.39	14.21	14.27	14.35	14.42	14.08	14.26	13.85	14.47	14.15	14.49
205835_s_at	YTHDC2	6.2e-20	3.05e-21	1.24	3.42	4.11	3.4	5.26	5.39	6.23	3.49	6.23	3.2	3.84	4.59	4.17	3	4.38	6.27	3.38	3.62	2.67	5.17	2.13	3.58	5.2	4.34	4.2	2.69	5.07	3.82	2.32	3.6	2.47	3.91	3.56	5.24	3.08	6.5	3.87	4.95	2.69	5.31	2.76	2.77	2.76	5.41	2.2	5.27
209702_at	FTO	1.3e-18	7.44e-20	-0.269	13.32	12.82	13.24	12.92	13.5	12.97	13.31	12.92	13.44	13.12	13.19	13.04	12.87	13.42	13.07	13.3	13.14	13.31	12.95	13.64	13.06	13.17	13.14	12.93	13.46	12.94	13.37	13.35	13.21	13.07	13.1	13.42	13.36	13.29	12.94	13.5	13.21	13.22	12.83	13.62	12.96	13.71	13.23	13.08	12.77
210285_x_at	WTAP	0.000602	0.000189	0.615	7.79	7.77	7.26	7.1	7.34	8.4	7.78	7.78	6.12	7.56	8.04	8.64	8.21	7.46	7.79	4.44	7.37	7.51	7.91	7.27	7.38	7.77	7.32	6.78	6.57	7.56	7.1	6.57	7	7.22	6.37	6.21	7.25	6.82	8.26	6.78	7.02	8.28	8.88	7.11	6.38	5.14	6.69	4.26	7.24
211971_s_at	LRPPRC	5.16e-09	8.59e-10	0.259	11.6	11.8	11.38	11.62	11.25	11.72	11.55	11.99	11.72	11.85	11.49	11.61	11.49	11.63	12.07	11.39	11.89	11.89	12.2	11.49	12.29	11.85	12.13	12	11.57	12	11.32	11.34	12.03	11.9	11.86	11.67	11.46	11.58	11.52	11.52	11.85	11.4	11.42	12.05	12.18	11.68	12.33	11.73	11.82
212455_at	YTHDC1	4.28e-13	4.49e-14	-0.192	14.08	13.9	13.62	13.49	13.75	13.73	14.04	13.59	14.13	13.93	13.8	13.62	13.85	14.01	13.67	14.23	13.97	13.99	13.73	14.36	13.75	14.07	13.79	13.6	13.95	13.76	13.89	13.95	13.95	14.07	13.88	14.09	13.99	14.05	13.76	13.96	13.79	13.95	13.74	14.23	14	13.84	14.02	14.08	13.7
218847_at	IGF2BP2	5.78e-14	5.5e-15	-0.562	10.93	10.65	10.66	10.26	10.4	10.14	10.73	9.81	10.89	10.46	10.27	9.67	10.17	10.21	9.96	11.11	9.96	10.33	10.08	10.03	10.32	10.94	9.68	9.6	10.48	10.11	10.44	10.32	10.06	10.28	10.4	11.25	10.42	11.29	9.43	11.05	10.39	10.49	9.48	11.26	10.73	11.43	10.97	11.08	10.04
222430_s_at	YTHDF2	0.00255	0.000884	0.258	9.29	9.2	9.96	10.02	9.69	9.79	9.73	9.82	8.95	9.39	9.86	10.21	9.84	9.91	9.17	9.5	9.44	9.49	9.86	7.86	8.83	8.86	8.85	9.44	8.58	9.56	9.29	9.13	9.09	8.33	9.2	8.8	9.15	9.27	10.18	8.87	9.32	9.31	10.34	8.81	8.79	8.16	8.82	8.35	10.04
227110_at	HNRNPC	1.02e-05	2.51e-06	0.334	11.93	11.72	10.93	11.09	11.11	11.38	11.14	11.65	11.23	11.7	10.84	11.62	11.08	11.42	11.74	11.52	11.55	10.78	11.53	11.68	12.38	11.01	11.88	11.47	11.19	11.35	11.21	10.95	11.54	8.04	11.42	11.42	11.46	11.36	11.21	11.16	11.57	10.99	10.66	11.21	11.99	11.41	11.69	10.95	11.16
227536_at	ZC3H13	3.93e-05	1.04e-05	-0.346	10.05	9.96	8.83	8.52	10.25	9.18	10.08	9.54	9.65	9.53	9.96	8.25	9.51	9.76	9.62	9.66	9.56	9.87	9.55	9.54	9.85	10.09	9.69	8.73	10.09	9.83	9.48	9.47	9.79	9.86	9.66	10.04	9.17	9.94	9.19	9.52	9.53	9.52	9.13	9.62	9.72	9.76	9.76	9.53	9.35
235552_at	METTL14	0.0307	0.013	0.107	9.94	10	9.77	9.76	9.61	9.77	9.75	9.83	9.84	9.71	9.76	9.54	9.5	9.57	9.87	9.93	10.01	9.77	9.9	9.38	10.06	9.88	9.98	9.77	9.78	9.8	9.54	9.51	9.86	9.73	9.83	10.01	9.67	9.83	9.78	9.79	9.78	9.35	9.8	9.78	9.82	9.47	10.06	9.78	9.81
242111_at	METTL3	2.06e-12	2.32e-13	-1.1	6.92	5.34	6.42	6.29	6.37	5.64	7.65	5.86	7.8	6.31	7.87	5.65	5.63	8.66	5.5	8.36	5.64	7.75	6.34	5.63	5.64	7.52	5.65	5.65	5.2	4.24	6.92	7.1	5.29	8.8	5.64	5.61	5.33	5.64	5.66	5.83	4.33	7.2	5.16	5.64	3.52	6.99	2.91	6.46	5.61
[truncated: 125 more columns]

## Sheet: string_interactions_short-net
#node1	node2	combined_score
ALKBH5	YTHDC2	0.792
ALKBH5	ZC3H13	0.786
ALKBH5	METTL3	0.932
ALKBH5	YTHDC1	0.892
ALKBH5	HNRNPA2B1	0.624
ALKBH5	WTAP	0.951
ALKBH5	RBM15	0.764
ALKBH5	YTHDF2	0.945
ALKBH5	METTL14	0.961
ALKBH5	HNRNPC	0.638
ALKBH5	YTHDF3	0.852
ALKBH5	FTO	0.979
FTO	YTHDC2	0.705
FTO	ZC3H13	0.62
FTO	METTL3	0.881
FTO	YTHDC1	0.79
FTO	HNRNPA2B1	0.539
FTO	WTAP	0.883
FTO	RBM15	0.676
FTO	YTHDF2	0.848
FTO	IGF2BP2	0.752
FTO	METTL14	0.944
FTO	HNRNPC	0.55
FTO	YTHDF3	0.784
HNRNPA2B1	YTHDC2	0.721
HNRNPA2B1	IGF2BP3	0.605
HNRNPA2B1	ZC3H13	0.574
HNRNPA2B1	METTL3	0.767
HNRNPA2B1	YTHDC1	0.731
HNRNPA2B1	IGF2BP2	0.46
HNRNPA2B1	RBM15	0.589
HNRNPA2B1	YTHDF3	0.628
HNRNPA2B1	WTAP	0.667
HNRNPA2B1	YTHDF2	0.695
HNRNPA2B1	METTL14	0.707
HNRNPA2B1	HNRNPC	0.998
HNRNPC	YTHDC2	0.747
HNRNPC	ZC3H13	0.602
HNRNPC	METTL3	0.819
HNRNPC	YTHDC1	0.756
HNRNPC	WTAP	0.699
HNRNPC	RBM15	0.699
HNRNPC	YTHDF2	0.716
HNRNPC	METTL14	0.725
HNRNPC	YTHDF3	0.647
IGF2BP2	IGF2BP3	0.48
IGF2BP2	METTL3	0.589
IGF2BP2	YTHDF2	0.441
IGF2BP2	YTHDF3	0.493
METTL14	YTHDC2	0.837
METTL14	ZC3H13	0.991
METTL14	METTL3	0.999
METTL14	YTHDC1	0.91
METTL14	WTAP	0.999
METTL14	RBM15	0.994
METTL14	YTHDF2	0.946
METTL14	YTHDF3	0.86
METTL3	YTHDC2	0.843
METTL3	ZC3H13	0.985
METTL3	YTHDF2	0.888
METTL3	YTHDF3	0.904
METTL3	YTHDC1	0.94
METTL3	RBM15	0.994
METTL3	WTAP	0.999
RBM15	YTHDC2	0.74
RBM15	ZC3H13	0.998
RBM15	YTHDC1	0.853
RBM15	WTAP	0.999
RBM15	YTHDF3	0.69
RBM15	YTHDF2	0.745
WTAP	YTHDC2	0.875
WTAP	ZC3H13	0.999
WTAP	YTHDC1	0.917
WTAP	YTHDF3	0.84
WTAP	YTHDF2	0.878
YTHDC1	YTHDC2	0.41
YTHDC1	ZC3H13	0.78
YTHDC1	YTHDF3	0.464
YTHDC1	YTHDF2	0.464
YTHDC2	YTHDF2	0.433
YTHDC2	YTHDF3	0.436
YTHDC2	ZC3H13	0.75
YTHDF2	ZC3H13	0.689
YTHDF2	YTHDF3	0.445
YTHDF3	ZC3H13	0.669

## Sheet: LASSO-coef
Symbol	Coef
FTO	-0.549786
IGF2BP2	-0.162411
METTL3	-0.0994712
YTHDC1	-0.0906129
ZC3H13	-0.0529164
HNRNPC	0.0521374
IGF2BP3	0.0570898
LRPPRC	0.0901244
YTHDC2	0.10707
HNRNPA2B1	0.28999

## Sheet: risk score
GSE30999	Group	RS			GSE13355	ID_REF	ID_REF	RS
	0	-5.13408				CTRL	GSM337197	-0.666778
	0	-4.90576				CTRL	GSM337198	-0.586466
	0	-4.79887				CTRL	GSM337199	-0.68354
	0	-5.14674				CTRL	GSM337200	-0.702541
	0	-5.21539				CTRL	GSM337201	-0.564898
	0	-4.96101				CTRL	GSM337202	-0.416235
	0	-5.10952				CTRL	GSM337203	-0.508531
	0	-5.23399				CTRL	GSM337204	-0.621864
	0	-5.12081				CTRL	GSM337205	-0.588278
	0	-5.31511				CTRL	GSM337206	-0.614954
	0	-4.91304				CTRL	GSM337207	-0.595347
	0	-5.0564				CTRL	GSM337208	-0.657121
	0	-5.01713				CTRL	GSM337209	-0.68713
	0	-5.17227				CTRL	GSM337210	-0.5737
	0	-5.33387				CTRL	GSM337211	-0.420769
	0	-5.13559				CTRL	GSM337212	-0.509187
	0	-5.09537				CTRL	GSM337213	-0.706208
	0	-5.13729				CTRL	GSM337214	-0.618777
	0	-4.98819				CTRL	GSM337215	-0.605401
	0	-5.28418				CTRL	GSM337216	-0.712094
	0	-5.53041				CTRL	GSM337217	-0.631391
	0	-5.13987				CTRL	GSM337218	-0.520979
	0	-5.00127				CTRL	GSM337219	-0.266328
	0	-4.7613				CTRL	GSM337220	-0.802245
	0	-4.83577				CTRL	GSM337221	-0.594811
	0	-5.03705				CTRL	GSM337222	-0.68587
	0	-4.99571				CTRL	GSM337223	-0.649365
	0	-5.23854				CTRL	GSM337224	-0.624734
	0	-4.99304				CTRL	GSM337225	-0.541251
	0	-5.00822				CTRL	GSM337226	-0.522973
	0	-5.23441				CTRL	GSM337227	-0.460834
	0	-4.81641				CTRL	GSM337228	-0.437795
	0	-5.23033				CTRL	GSM337229	-0.678339
	0	-5.09583				CTRL	GSM337230	-0.592396
	0	-4.82901				CTRL	GSM337231	-0.609572
	0	-5.01468				CTRL	GSM337232	-0.621017
	0	-5.01434				CTRL	GSM337233	-0.627827
	0	-4.97701				CTRL	GSM337234	-0.591527
	0	-4.84742				CTRL	GSM337235	-0.616808
	0	-5.2998				CTRL	GSM337236	-0.566041
	0	-5.31648				CTRL	GSM337237	-0.794665
	0	-4.88093				CTRL	GSM337238	-0.693793
	0	-5.03559				CTRL	GSM337239	-0.425757
	0	-5.0375				CTRL	GSM337240	-0.4886
	0	-5.13923				CTRL	GSM337241	-0.619774
	0	-5.26615				CTRL	GSM337242	-0.552057
	0	-4.94307				CTRL	GSM337243	-0.842571
	0	-5.03099				CTRL	GSM337244	-0.724557
	0	-5.13904				CTRL	GSM337245	-0.536289
	0	-4.62932				CTRL	GSM337246	-0.623012
	0	-5.07999				CTRL	GSM337247	-0.548363
	0	-5.16162				CTRL	GSM337248	-0.813967
	0	-4.96889				CTRL	GSM337249	-0.556055
	0	-5.07456				CTRL	GSM337250	-0.904221
	0	-5.02051				CTRL	GSM337251	-0.6632
	0	-5.02624				CTRL	GSM337252	-0.751974
	0	-4.82965				CTRL	GSM337253	-0.699093
	0	-4.9278				CTRL	GSM337254	-0.373475
	0	-5.15791				CTRL	GSM337255	-0.467574
	0	-5.08913				CTRL	GSM337256	-0.478712
	0	-5.01784				CTRL	GSM337257	-0.694313
	0	-5.17143				CTRL	GSM337258	-0.445977
	0	-5.14852				CTRL	GSM337259	-0.49261
	0	-4.78495				CTRL	GSM337260	-0.652959
	0	-5.01331				CASE	GSM337261	-0.593272
	0	-4.91221				CASE	GSM337262	-0.473955
	0	-4.98803				CASE	GSM337263	-0.761418
	0	-4.8946				CASE	GSM337264	-0.574891
	0	-5.19786				CASE	GSM337265	-0.272069
	0	-5.00553				CASE	GSM337266	-0.524456
	0	-5.08642				CASE	GSM337267	-0.683227
	0	-5.3295				CASE	GSM337268	-0.51843
	0	-4.74608				CASE	GSM337269	-0.697965
	0	-4.90146				CASE	GSM337270	-0.538042
	0	-4.97292				CASE	GSM337271	-0.564447
	0	-5.08969				CASE	GSM337272	-0.747731
	0	-5.20205				CASE	GSM337273	-0.658755
	0	-5.1236				CASE	GSM337274	-0.626829
	0	-4.95037				CASE	GSM337275	-0.579683
	0	-4.86926				CASE	GSM337276	-0.683361
	0	-4.94316				CASE	GSM337277	-0.630466
	0	-4.94797				CASE	GSM337278	-0.543452
	0	-4.88142				CASE	GSM337279	-0.714485
	0	-5.05604				CASE	GSM337280	-0.310102
	0	-5.11311				CASE	GSM337281	-0.541485
	1	-4.48668				CASE	GSM337282	-0.772188
	1	-4.39616				CASE	GSM337283	-0.4005
	1	-4.19799				CASE	GSM337284	-0.493495
	1	-4.13099				CASE	GSM337285	-0.496125
	1	-4.6966				CASE	GSM337286	-0.534485
	1	-4.37699				CASE	GSM337287	-0.392296
	1	-4.60294				CASE	GSM337288	-0.538949
	1	-4.19023				CASE	GSM337289	-0.704307
	1	-4.56423				CASE	GSM337290	-0.875399
	1	-4.31833				CASE	GSM337291	-0.696041
	1	-4.52496				CASE	GSM337292	-0.252423
	1	-4.39042				CASE	GSM337293	-0.537599
	1	-4.29068				CASE	GSM337294	-0.370806
	1	-4.21415				CASE	GSM337295	-0.71293
	1	-4.67913				CASE	GSM337296	-0.655205
	1	-4.65894				CASE	GSM337297	-0.616047
	1	-4.68816				CASE	GSM337298	-0.246057
	1	-4.13802				CASE	GSM337299	-0.75812
	1	-4.46648				CASE	GSM337300	-0.429036
	1	-4.18049				CASE	GSM337301	-0.514693
	1	-4.48147				CASE	GSM337302	-0.793324
	1	-4.29183				CASE	GSM337303	-0.458045
	1	-4.21481				CASE	GSM337304	-0.531965
	1	-4.38435				CASE	GSM337305	-0.571325
	1	-4.51191				CASE	GSM337306	-0.44836
	1	-4.37496				CASE	GSM337307	-0.496497
	1	-4.46424				CASE	GSM337308	-0.617434
	1	-4.41451				CASE	GSM337309	-0.418395
	1	-4.53076				CASE	GSM337310	-0.534655
	1	-4.51167				CASE	GSM337311	-0.707867
	1	-4.31957				CASE	GSM337312	-0.301359
	1	-4.40167				CASE	GSM337313	-0.612286
	1	-4.36071				CASE	GSM337314	-0.571841
	1	-4.37679				CASE	GSM337315	-0.471213
	1	-4.34457				CASE	GSM337316	-0.61841
	1	-4.67933				CASE	GSM337317	-0.623067
	1	-4.33198				CASE	GSM337318	-0.504854
	1	-4.51422				CASE	GSM337319	0.104633
	1	-4.8075				CASE	GSM337320	-0.226749
	1	-4.40216				CASE	GSM337321	-0.00733125
	1	-4.64732				CASE	GSM337322	-0.0993285
	1	-4.57078				CASE	GSM337323	-0.13784
	1	-4.33995				CASE	GSM337324	0.102917
	1	-4.29964				CASE	GSM337325	-0.0536304
	1	-4.2593				CASE	GSM337326	-0.0559659
	1	-4.47729				CASE	GSM337327	-0.32271
	1	-4.34938				CASE	GSM337328	-0.322491
	1	-4.34994				CASE	GSM337329	-0.0408729
	1	-4.61009				CASE	GSM337330	-0.189694
	1	-4.47672				CASE	GSM337331	-0.0496218
	1	-4.42564				CASE	GSM337332	0.202793
	1	-4.47575				CASE	GSM337333	0.100572
	1	-4.77189				CASE	GSM337334	-0.498493
	1	-4.41989				CASE	GSM337335	-0.100142
	1	-4.38503				CASE	GSM337336	-0.24455
	1	-4.24349				CASE	GSM337337	-0.249943
	1	-4.40053				CASE	GSM337338	0.0461152
	1	-4.09226				CASE	GSM337339	-0.256336
	1	-4.5975				CASE	GSM337340	-0.470126
	1	-4.35131				CASE	GSM337341	-0.296075
	1	-5.04466				CASE	GSM337342	-0.00862719
	1	-4.45328				CASE	GSM337343	-0.52597
	1	-4.75004				CASE	GSM337344	0.0655467
	1	-4.27638				CASE	GSM337345	-0.0736751
	1	-4.61974				CASE	GSM337346	0.128484
	1	-4.32627				CASE	GSM337347	0.142477
	1	-4.34232				CASE	GSM337348	-0.050847
	1	-4.42746				CASE	GSM337349	-0.234887
	1	-4.74452				CASE	GSM337350	-0.0303297
	1	-4.43061				CASE	GSM337351	-0.0494001
	1	-4.37791				CASE	GSM337352	-0.15294
	1	-4.24305				CASE	GSM337353	-0.244187
	1	-4.36202				CASE	GSM337354	-0.263794
	1	-4.28291				CASE	GSM337355	-0.345234
	1	-4.60072				CASE	GSM337356	0.254728
	1	-4.36115				CASE	GSM337357	-0.342318
	1	-4.35657				CASE	GSM337358	-0.00256258
	1	-4.43304				CASE	GSM337359	-0.271987
	1	-4.44345				CASE	GSM337360	0.000645527
	1	-4.85441				CASE	GSM337361	-0.34594
	1	-4.2753				CASE	GSM337362	-0.338767
	1	-4.41119				CASE	GSM337363	0.012603
	1	-3.93048				CASE	GSM337364	-0.335447
	1	-4.33164				CASE	GSM337365	-0.0534567
	1	-4.01658				CASE	GSM337366	-0.375954
						CASE	GSM337367	-0.103977
						CASE	GSM337368	-0.275873
						CASE	GSM337369	-0.234677
						CASE	GSM337370	0.250696
						CASE	GSM337371	-0.267174
						CASE	GSM337372	-0.125362
						CASE	GSM337373	-0.0541413
						CASE	GSM337374	-0.116314
						CASE	GSM337375	-0.0963802
						CASE	GSM337376	0.165828

## Sheet: subtype-infor
ID	Subtype	m6A
GSM767977	1	0.661488
GSM767979	1	0.676059
GSM767981	1	0.65394
GSM767983	1	0.671663
GSM767985	1	0.663468
GSM767987	1	0.683824
GSM767988	1	0.643843
GSM767990	1	0.644934
GSM767992	1	0.638276
GSM767994	1	0.666948
GSM767996	1	0.631824
GSM767998	1	0.634811
GSM767999	1	0.637442
GSM768004	1	0.627191
GSM768006	1	0.635146
GSM768008	1	0.643157
GSM768010	1	0.654211
GSM768014	1	0.649041
GSM768020	1	0.654626
GSM768026	1	0.647853
GSM768028	1	0.623377
GSM768030	1	0.623544
GSM768032	1	0.643328
GSM768034	1	0.636726
GSM768038	1	0.64117
GSM768040	1	0.645473
GSM768045	1	0.622132
GSM768049	1	0.66463
GSM768051	1	0.672647
GSM768053	1	0.65943
GSM768055	1	0.650774
GSM768057	1	0.663118
GSM768058	1	0.651126
GSM768065	1	0.647961
GSM768067	1	0.623029
GSM768071	1	0.632709
GSM768073	1	0.660471
GSM768081	1	0.653511
GSM768083	1	0.625522
GSM768085	1	0.65477
GSM768089	1	0.630361
GSM768093	1	0.632548
GSM768097	1	0.664448
GSM768101	1	0.644586
GSM768103	1	0.64358
GSM768105	1	0.632146
GSM768107	1	0.637572
GSM768109	1	0.624233
GSM768111	1	0.630517
GSM768113	1	0.622583
GSM768115	1	0.656427
GSM768117	1	0.630085
GSM768119	1	0.62418
GSM768121	1	0.648998
GSM768123	1	0.652235
GSM768125	1	0.65833
GSM768127	1	0.644669
GSM768129	1	0.639437
GSM768131	1	0.613526
GSM768135	1	0.661824
GSM768137	1	0.641453
GSM768139	1	0.626844
GSM768143	1	0.643592
GSM768001	2	0.648371
GSM768012	2	0.638931
GSM768016	2	0.634395
GSM768018	2	0.614956
GSM768022	2	0.635512
GSM768024	2	0.619529
GSM768036	2	0.640327
GSM768042	2	0.632508
GSM768047	2	0.610219
GSM768060	2	0.630719
GSM768063	2	0.599507
GSM768069	2	0.621241
GSM768075	2	0.640045
GSM768077	2	0.63117
GSM768079	2	0.646922
GSM768087	2	0.639826
GSM768091	2	0.603363
GSM768095	2	0.601584
GSM768099	2	0.640074
GSM768133	2	0.633749
GSM768141	2	0.61236
GSM768145	2	0.627423

## Sheet: GSE30999-10exp-LS-subtype-test
Subtype	pvalue	1	1	1	1	1	1	1	1	1	1	1	1	1	1	1	1	1	1	1	1	1	1	1	1	1	1	1	1	1	1	1	1	1	1	1	1	1	1	1	1	1	1	1	1	1	1	1	1
METTL3	5.98764e-13	5.34	6.29	5.64	5.86	6.31	5.65	5.63	5.5	5.64	6.34	5.64	5.65	5.65	5.29	5.64	5.33	5.66	5.16	5.61	5.63	5.61	5.61	5.12	5.63	5.92	5.64	5.6	5.63	5.71	6.32	5.63	5.99	6.24	5.64	5.63	5.07	5.65	5.64	4.77	6.05	5.64	5.64	5.63	5.58	5.6	5.62	4.97	5.38
LRPPRC	8.79999e-05	11.8	11.62	11.72	11.99	11.85	11.61	11.49	12.07	11.89	12.2	12.29	12.13	12	12.03	11.86	11.46	11.52	11.42	11.82	11.89	12.23	11.97	12.46	11.97	12.25	11.92	11.81	11.94	11.91	11.66	11.58	11.73	11.54	11.8	11.54	12.1	11.42	11.75	11.87	11.82	11.76	11.68	11.08	11.63	12.14	11.81	11.65	12.16
HNRNPC	0.038618	11.72	11.09	11.38	11.65	11.7	11.62	11.08	11.74	11.55	11.53	12.38	11.88	11.47	11.54	11.42	11.46	11.21	10.66	11.16	11.42	11.4	11.56	12.07	11.35	11.87	11.19	10.87	11.4	11.13	11.46	10.93	11.25	10.47	11.15	11.05	11.46	10.74	11.52	11.18	11.15	11.27	11.58	10.84	11.1	11.73	11.5	11.03	11.6
FTO	0.0876866	12.82	12.92	12.97	12.92	13.12	13.04	12.87	13.07	13.14	12.95	13.06	13.14	12.93	13.21	13.1	13.36	12.94	12.83	12.77	12.97	12.98	12.98	13.16	13.07	12.4	12.9	12.72	13	12.81	12.98	12.85	13.13	13.03	12.56	12.84	12.94	13.02	13.26	13.01	13.08	12.89	13.09	13.24	13.2	12.7	13.15	12.87	12.89
ZC3H13	0.0944578	9.96	8.52	9.18	9.54	9.53	8.25	9.51	9.62	9.56	9.55	9.85	9.69	8.73	9.79	9.66	9.17	9.19	9.13	9.35	9.09	9.52	9.34	9.48	9.06	9.85	8.54	9.22	9.75	9.51	9.84	8.79	9.61	8.7	9.2	9.19	9.43	9.54	9.55	9.55	9.5	9.44	9.76	9.52	9.55	9.41	9.53	8.96	10
YTHDC2	0.108542	4.11	5.26	6.23	6.23	3.84	4.17	3	6.27	3.62	5.17	3.58	4.34	4.2	3.6	3.91	5.24	6.5	5.31	5.27	4.03	4.67	3.76	4.04	4.21	3.66	5.15	4.42	5.96	4.24	3.46	4.25	4.71	4.52	3.6	4.74	4.43	3.96	4.17	4.37	5.37	4.25	3.88	2.76	3.3	4.3	4.42	4.33	4.59
IGF2BP2	0.140237	10.65	10.26	10.14	9.81	10.46	9.67	10.17	9.96	9.96	10.08	10.32	9.68	9.6	10.06	10.4	10.42	9.43	9.48	10.04	9.35	10.25	9.14	10.41	10.03	11.49	10.45	9.61	10.29	10.56	10.51	10	10.69	9.99	10.09	10.25	9.73	10.49	10.92	10.15	10	9.84	9.97	10.67	10.16	10.09	10.32	9.74	10.03
HNRNPA2B1	0.323151	14.4	14.42	14.54	14.48	14.48	14.42	14.45	14.53	14.47	14.6	14.43	14.59	14.44	14.26	14.34	14.21	14.39	14.42	14.49	14.15	14.26	14.14	14.28	14.3	14.39	14.2	14.1	14.37	14.27	14.11	14.33	14.45	14.28	14.52	14.14	14.19	14.37	14.35	14.36	14.52	14.35	14.34	14.14	14.36	14.33	14.26	14.17	14.37
YTHDC1	0.328442	13.9	13.49	13.73	13.59	13.93	13.62	13.85	13.67	13.97	13.73	13.75	13.79	13.6	13.95	13.88	13.99	13.76	13.74	13.7	13.74	13.81	13.73	13.78	13.82	13.9	13.79	13.87	13.57	13.79	13.73	13.81	13.74	13.62	13.88	13.76	13.76	13.63	13.84	13.76	13.93	13.67	13.84	13.75	13.7	13.71	13.64	13.4	13.68
IGF2BP3	0.356074	5.58	5.29	5.91	5.79	5.63	5.52	5.57	5.66	6.18	5.79	5.93	5.64	5.55	5.59	5.62	5.61	5.47	5.59	5.56	6.28	5.57	5.57	5.76	5.72	6.37	6.38	5.57	5.54	5.58	5.58	5.94	5.58	5.6	6.12	5.53	5.56	6.54	6.04	5.66	6.39	5.6	5.6	5.56	5.51	5.61	5.48	5.54	5.57
[truncated: 37 more columns]

## Sheet: ROC curves-SVM model-subtype
Gene.symbol	Subtype	METTL3	IGF2BP2	ZC3H13	FTO	YTHDC1	HNRNPA2B1	IGF2BP3	LRPPRC	HNRNPC	YTHDC2
GSM767977	1	5.34	10.65	9.96	12.82	13.9	14.4	5.58	11.8	11.72	4.11
GSM767979	1	6.29	10.26	8.52	12.92	13.49	14.42	5.29	11.62	11.09	5.26
GSM767981	1	5.64	10.14	9.18	12.97	13.73	14.54	5.91	11.72	11.38	6.23
GSM767983	1	5.86	9.81	9.54	12.92	13.59	14.48	5.79	11.99	11.65	6.23
GSM767985	1	6.31	10.46	9.53	13.12	13.93	14.48	5.63	11.85	11.7	3.84
GSM767987	1	5.65	9.67	8.25	13.04	13.62	14.42	5.52	11.61	11.62	4.17
GSM767988	1	5.63	10.17	9.51	12.87	13.85	14.45	5.57	11.49	11.08	3
GSM767990	1	5.5	9.96	9.62	13.07	13.67	14.53	5.66	12.07	11.74	6.27
GSM767992	1	5.64	9.96	9.56	13.14	13.97	14.47	6.18	11.89	11.55	3.62
GSM767994	1	6.34	10.08	9.55	12.95	13.73	14.6	5.79	12.2	11.53	5.17
GSM767996	1	5.64	10.32	9.85	13.06	13.75	14.43	5.93	12.29	12.38	3.58
GSM767998	1	5.65	9.68	9.69	13.14	13.79	14.59	5.64	12.13	11.88	4.34
GSM767999	1	5.65	9.6	8.73	12.93	13.6	14.44	5.55	12	11.47	4.2
GSM768004	1	5.29	10.06	9.79	13.21	13.95	14.26	5.59	12.03	11.54	3.6
GSM768006	1	5.64	10.4	9.66	13.1	13.88	14.34	5.62	11.86	11.42	3.91
GSM768008	1	5.33	10.42	9.17	13.36	13.99	14.21	5.61	11.46	11.46	5.24
GSM768010	1	5.66	9.43	9.19	12.94	13.76	14.39	5.47	11.52	11.21	6.5
GSM768014	1	5.16	9.48	9.13	12.83	13.74	14.42	5.59	11.42	10.66	5.31
GSM768020	1	5.61	10.04	9.35	12.77	13.7	14.49	5.56	11.82	11.16	5.27
GSM768026	1	5.63	9.35	9.09	12.97	13.74	14.15	6.28	11.89	11.42	4.03
GSM768028	1	5.61	10.25	9.52	12.98	13.81	14.26	5.57	12.23	11.4	4.67
GSM768030	1	5.61	9.14	9.34	12.98	13.73	14.14	5.57	11.97	11.56	3.76
GSM768032	1	5.12	10.41	9.48	13.16	13.78	14.28	5.76	12.46	12.07	4.04
GSM768034	1	5.63	10.03	9.06	13.07	13.82	14.3	5.72	11.97	11.35	4.21
GSM768038	1	5.92	11.49	9.85	12.4	13.9	14.39	6.37	12.25	11.87	3.66
GSM768040	1	5.64	10.45	8.54	12.9	13.79	14.2	6.38	11.92	11.19	5.15
GSM768045	1	5.6	9.61	9.22	12.72	13.87	14.1	5.57	11.81	10.87	4.42
GSM768049	1	5.63	10.29	9.75	13	13.57	14.37	5.54	11.94	11.4	5.96
GSM768051	1	5.71	10.56	9.51	12.81	13.79	14.27	5.58	11.91	11.13	4.24
GSM768053	1	6.32	10.51	9.84	12.98	13.73	14.11	5.58	11.66	11.46	3.46
GSM768055	1	5.63	10	8.79	12.85	13.81	14.33	5.94	11.58	10.93	4.25
GSM768057	1	5.99	10.69	9.61	13.13	13.74	14.45	5.58	11.73	11.25	4.71
GSM768058	1	6.24	9.99	8.7	13.03	13.62	14.28	5.6	11.54	10.47	4.52
GSM768065	1	5.64	10.09	9.2	12.56	13.88	14.52	6.12	11.8	11.15	3.6
GSM768067	1	5.63	10.25	9.19	12.84	13.76	14.14	5.53	11.54	11.05	4.74
GSM768071	1	5.07	9.73	9.43	12.94	13.76	14.19	5.56	12.1	11.46	4.43
GSM768073	1	5.65	10.49	9.54	13.02	13.63	14.37	6.54	11.42	10.74	3.96
GSM768081	1	5.64	10.92	9.55	13.26	13.84	14.35	6.04	11.75	11.52	4.17
GSM768083	1	4.77	10.15	9.55	13.01	13.76	14.36	5.66	11.87	11.18	4.37
GSM768085	1	6.05	10	9.5	13.08	13.93	14.52	6.39	11.82	11.15	5.37
GSM768089	1	5.64	9.84	9.44	12.89	13.67	14.35	5.6	11.76	11.27	4.25
GSM768093	1	5.64	9.97	9.76	13.09	13.84	14.34	5.6	11.68	11.58	3.88
GSM768097	1	5.63	10.67	9.52	13.24	13.75	14.14	5.56	11.08	10.84	2.76
GSM768101	1	5.58	10.16	9.55	13.2	13.7	14.36	5.51	11.63	11.1	3.3
GSM768103	1	5.6	10.09	9.41	12.7	13.71	14.33	5.61	12.14	11.73	4.3
GSM768105	1	5.62	10.32	9.53	13.15	13.64	14.26	5.48	11.81	11.5	4.42
GSM768107	1	4.97	9.74	8.96	12.87	13.4	14.17	5.54	11.65	11.03	4.33
GSM768109	1	5.38	10.03	10	12.89	13.68	14.37	5.57	12.16	11.6	4.59
GSM768111	1	5.62	9.96	9.2	12.92	13.58	14.46	5.55	11.99	11.55	3.52
GSM768113	1	5.63	10.43	8.41	13.3	13.63	14.25	6.13	11.53	11.49	3.56
GSM768115	1	5.63	9.26	8.35	12.75	13.65	14.18	5.61	11.42	10.75	2.8
GSM768117	1	5.63	9.97	9.3	12.85	13.63	14.3	5.28	12.05	11.83	4.13
GSM768119	1	5.64	10.55	9.65	12.74	13.89	14.36	5.91	12.25	11.83	5.44
GSM768121	1	5.62	10.29	9.3	12.69	13.75	14.27	5.57	11.6	11.07	4.71
GSM768123	1	5.36	10.08	9.53	12.94	13.61	14.45	5.54	12.15	11.59	4.98
GSM768125	1	5.66	9.79	9.12	13.05	13.61	14.07	5.5	11.62	10.87	4.06
GSM768127	1	5.63	9.85	8.65	12.98	13.55	14.46	5.57	11.45	11.05	4.68
GSM768129	1	5.63	9.56	9.54	13.02	13.64	14.25	5.57	12.07	11.73	4.72
GSM768131	1	5.63	10.74	8.95	12.74	13.29	14.13	5.24	11.72	11.29	4.78
GSM768135	1	5.64	10.41	9.74	13.15	13.86	14.29	5.57	11.49	11.24	2.94
GSM768137	1	5.61	10.33	8.97	12.92	13.59	14.35	5.58	12.17	11.3	5.64
GSM768139	1	5.63	9.83	7.34	12.75	13.53	14.08	5.66	11.48	10.83	3.4
GSM768143	1	5.63	10.39	9.58	12.79	13.79	14.43	5.59	12.25	11.89	4.45
GSM768001	2	4.24	10.11	9.83	12.94	13.76	14.47	5.58	12	11.35	5.07
GSM768012	2	4.33	10.39	9.53	13.21	13.79	14.27	5.76	11.85	11.57	4.95
GSM768016	2	3.52	10.73	9.72	12.96	14	14.26	6.39	12.18	11.99	2.77
GSM768018	2	2.91	10.97	9.76	13.23	14.02	14.47	6.02	12.33	11.69	5.41
GSM768022	2	3.52	10.43	9.72	13.28	13.99	14.47	6.26	12.11	11.9	4.46
GSM768024	2	3.85	11.05	9.44	13.11	14	14.67	6.49	12.01	11.31	3.22
GSM768036	2	4.06	9.46	9.17	13	13.74	14.19	5.58	11.94	11.65	3.56
GSM768042	2	4.5	10.03	8.97	12.88	13.73	14.17	5.58	11.83	11.1	3.99
GSM768047	2	4.82	10.65	9.22	13.14	13.82	14.33	5.58	11.75	11.41	3.42
GSM768060	2	4.16	10.2	9.65	13.04	13.77	14.36	5.77	12.18	11.71	4.26
GSM768063	2	3.68	9.27	8.75	12.89	13.83	14	6.03	11.95	10.51	3.23
GSM768069	2	3.54	10.35	9.99	13	13.7	14.46	5.56	12.04	11.64	3.72
GSM768075	2	4.49	10.81	9.84	13.02	13.63	14.44	5.59	12.16	11.45	4.11
GSM768077	2	4.27	10.23	9.6	13	13.72	14.42	5.58	11.96	11.79	3.42
GSM768079	2	3.92	10.5	9.58	12.91	13.86	14.42	5.66	11.98	11.53	2.75
GSM768087	2	4.52	10.03	9.57	12.96	13.67	14.35	5.56	12	11.47	5.11
GSM768091	2	2.86	9.04	9.42	13.16	13.9	14.24	5.77	12	11.7	4.7
GSM768095	2	2.42	10.23	9.67	13.21	13.64	14.42	5.58	11.98	11.49	3.57
GSM768099	2	3.88	10.53	9.52	13.12	13.61	14.39	5.47	11.78	11.44	4.2
GSM768133	2	3.86	10.58	9.37	13.08	13.66	14.14	5.25	12.17	12.36	4.13
GSM768141	2	3.75	10.36	8.83	12.73	13.4	14.6	5.57	12.17	11.63	5.14
GSM768145	2	3.94	10.59	8.97	12.74	13.6	14.71	6.23	12.37	11.41	4.44

## Sheet: go_result KEGG
ONTOLOGY	ID	Description	Count	pvalue	FDR	geneID
BP	GO:0002283	neutrophil activation involved in immune response	75	3.08e-09	1.57e-05	26/101/306/327/387/391/427/719/728/847/929/945/948/960/1075/1378/1508/1520/1727/1774/1776/1823/1992/2219/2268/2357/2512/2919/2950/3303/3326/3608/3614/3684/3903/4057/4282/4311/4680/5269/5329/5473/5695/5702/5709/5719/5806/5870/5878/5879/6402/7130/7305/8566/8826/10097/10288/10312/10450/11010/22931/23526/23601/25801/28956/51411/51552/51806/53831/57153/64333/79930/81619/158747/258010
BP	GO:0043312	neutrophil degranulation	74	5.41e-09	1.57e-05	26/101/306/327/387/391/427/719/728/847/929/945/948/960/1075/1378/1508/1520/1727/1774/1823/1992/2219/2268/2357/2512/2919/2950/3303/3326/3608/3614/3684/3903/4057/4282/4311/4680/5269/5329/5473/5695/5702/5709/5719/5806/5870/5878/5879/6402/7130/7305/8566/8826/10097/10288/10312/10450/11010/22931/23526/23601/25801/28956/51411/51552/51806/53831/57153/64333/79930/81619/158747/258010
BP	GO:1901987	regulation of cell cycle phase transition	72	2.54e-08	4.9e-05	207/637/641/701/983/1111/1781/1981/3161/3275/3398/4194/5087/5347/5518/5591/5690/5691/5695/5696/5702/5709/5710/5716/5719/5884/5934/6790/7027/7157/7175/7272/7283/7465/7508/8451/8612/8636/9125/9319/9344/9555/9587/9662/9700/9793/10142/10403/10783/10806/10926/22897/22995/25942/28984/29086/29882/29997/51347/51514/51720/54820/55142/56892/57521/79441/79733/79791/81610/81620/84967/286053
BP	GO:0022407	regulation of cell-cell adhesion	64	2.73e-07	0.000381234	18/100/101/207/387/604/920/942/960/972/1739/1948/2615/3037/3552/3557/3566/3569/3575/3593/3620/3655/3659/3716/3932/3956/4680/5295/5329/5607/5879/6366/6385/6403/7070/7082/8808/9466/10019/10211/10288/10563/10630/10859/11326/23240/23513/25930/26191/28984/29851/50848/53833/56253/56339/57669/64926/79576/80139/80149/84695/140706/149041/375056
BP	GO:1902749	regulation of cell cycle G2/M phase transition	39	3.29e-07	0.000381234	641/983/1111/1781/3161/5087/5347/5518/5690/5691/5695/5696/5702/5709/5710/5716/5719/5884/6790/7157/7283/8636/9344/9555/9662/9793/10142/10806/22897/22995/25942/29086/29997/51347/51514/51720/54820/55142/79441
BP	GO:0000075	cell cycle checkpoint	39	4.2e-07	0.000405818	641/701/983/1111/1407/1739/4194/5347/5546/5591/5810/5884/5934/6790/7027/7157/7175/7272/7465/7508/7919/8451/9125/9319/9344/9587/10403/28984/29086/29997/51347/51514/51720/64858/64859/79733/79791/81620/84444
BP	GO:0001819	positive regulation of cytokine production	64	5.23e-07	0.000410636	101/602/719/728/841/914/920/929/942/947/948/972/1385/1652/1660/2219/2268/3303/3552/3556/3569/3593/3620/3659/4060/4063/4282/5045/5295/5591/6095/6772/6778/6885/7096/7305/8808/9447/9466/10084/10211/10288/10564/10623/10859/23513/23601/23643/23705/24145/26191/26253/28984/29072/29923/29997/51157/53833/55122/55703/56253/140706/148022/338382
BP	GO:1901990	regulation of mitotic cell cycle phase transition	64	5.67e-07	0.000410636	207/637/641/701/983/1781/1981/3161/3275/3398/4194/5087/5347/5518/5591/5690/5691/5695/5696/5702/5709/5710/5716/5719/5884/5934/6790/7027/7157/7175/7272/7283/7465/7508/8451/8636/9125/9319/9344/9587/9662/9700/9793/10142/10403/10783/10806/22897/22995/25942/28984/29882/29997/51347/51514/54820/55142/57521/79441/79733/79791/81620/84967/286053
BP	GO:0042110	T cell activation	67	9.08e-07	0.000584637	100/101/207/387/602/604/841/914/920/942/960/972/1209/1378/1739/1948/2615/3140/3552/3566/3569/3575/3593/3620/3659/3702/3932/3956/3981/4063/4277/5295/5591/5879/6095/6304/6366/6385/6778/7070/7157/8456/8808/9466/9935/10288/10312/10859/11119/11326/23240/23513/26191/26253/29851/30968/53833/55716/56253/56339/64926/79576/80149/84695/120425/149041/197358
BP	GO:0030217	T cell differentiation	42	1.08e-06	0.000625153	100/101/387/602/604/914/920/942/972/1209/1378/3140/3552/3566/3569/3575/3593/3659/3702/3932/3981/4063/5591/6095/6304/6778/7157/8456/8808/9935/10288/10312/23240/26191/26253/55716/56253/56339/79576/80149/84695/149041
BP	GO:0050663	cytokine secretion	18	4.67e-06	0.00246057	929/947/2268/2615/3552/3937/4282/5552/6284/7096/8291/11119/23601/23705/24145/26253/28984/56253
BP	GO:0042770	signal transduction in response to DNA damage	26	6.09e-06	0.00270927	546/602/637/960/972/983/1111/4194/4282/4487/5347/5591/5716/5934/6790/7027/7157/9125/10524/28984/29086/51514/51720/55702/79733/161742
BP	GO:0007093	mitotic cell cycle checkpoint	30	6.47e-06	0.00270927	641/701/983/1739/4194/5347/5546/5591/5884/5934/6790/7027/7157/7175/7272/7465/7508/9125/9319/9344/9587/10403/28984/29997/51347/64858/64859/79733/79791/81620
BP	GO:0010389	regulation of G2/M transition of mitotic cell cycle	34	6.55e-06	0.00270927	641/983/1781/3161/5087/5347/5518/5690/5691/5695/5696/5702/5709/5710/5716/5719/5884/6790/7283/8636/9344/9662/9793/10142/10806/22897/22995/25942/29997/51347/51514/54820/55142/79441
BP	GO:0051169	nuclear transport	51	7.82e-06	0.00302266	207/406/948/983/1020/1660/1994/3326/4928/5295/5433/5494/5784/6429/7157/7175/7514/7919/8106/8815/8882/9349/9670/9785/9818/10553/11052/11218/22931/23039/23279/23534/29072/51319/51362/51715/55027/55341/55677/56478/64062/65110/79023/79711/80149/81608/84220/84934/285190/643136/653489
BP	GO:0030098	lymphocyte differentiation	52	8.76e-06	0.00317254	100/101/387/602/604/914/920/942/972/1209/1378/3140/3398/3552/3566/3569/3575/3593/3659/3702/3932/3956/3981/4063/4242/5295/5591/6095/6304/6778/7157/8456/8808/9452/9935/10288/10312/23240/23529/26191/26253/54856/55716/55846/56253/56339/56833/79576/80149/84695/149041/359948
BP	GO:0006913	nucleocytoplasmic transport	50	1.31e-05	0.00446941	207/406/948/983/1020/1660/1994/3326/4928/5295/5433/5494/5784/6429/7157/7175/7514/7919/8106/8882/9349/9670/9785/9818/10553/11052/11218/22931/23039/23279/23534/29072/51319/51362/51715/55027/55341/55677/56478/64062/65110/79023/79711/80149/81608/84220/84934/285190/643136/653489
BP	GO:1902750	negative regulation of cell cycle G2/M phase transition	22	1.57e-05	0.0050078	641/983/1111/5347/5690/5691/5695/5696/5702/5709/5710/5716/5719/5884/6790/9344/9555/29086/29997/51347/51514/51720
BP	GO:0022408	negative regulation of cell-cell adhesion	32	1.64e-05	0.0050078	18/207/604/942/972/1739/2615/3557/3566/3620/3659/5607/6366/6385/10019/10288/10859/11326/23240/23513/26191/28984/53833/56253/56339/57669/80139/80149/84695/140706/149041/375056
BP	GO:0044839	cell cycle G2/M phase transition	41	1.81e-05	0.00525751	641/983/1111/1781/3161/5087/5347/5518/5690/5691/5695/5696/5702/5709/5710/5716/5719/5884/6790/7157/7164/7283/7465/8636/9344/9555/9662/9793/10142/10806/22897/22995/25942/29086/29997/51347/51514/51720/54820/55142/79441
BP	GO:0000077	DNA damage checkpoint	27	2.25e-05	0.00619971	641/983/1111/1407/4194/5347/5591/5810/5884/5934/6790/7027/7157/7508/7919/8451/9125/9344/28984/29086/29997/51347/51514/51720/79733/79791/84444
BP	GO:0050715	positive regulation of cytokine secretion	11	2.47e-05	0.00647619	929/947/2268/3552/4282/23601/23705/24145/26253/28984/56253
BP	GO:0034504	protein localization to nucleus	41	2.57e-05	0.00647619	207/406/585/602/948/983/1020/1736/1994/2752/3326/4487/4928/5295/5300/5347/7157/7175/7514/8882/9349/9670/9818/9913/23400/23534/23568/23650/25777/25942/29997/51715/55027/79711/80149/81603/83593/84220/163590/285190/653489
BP	GO:0031570	DNA integrity checkpoint	28	2.71e-05	0.00653718	641/983/1111/1407/4194/5347/5591/5810/5884/5934/6790/7027/7157/7508/7919/8451/9125/9344/28984/29086/29997/51347/51514/51720/79733/79791/81620/84444
BP	GO:0022409	positive regulation of cell-cell adhesion	41	3.05e-05	0.00706486	100/101/207/387/604/920/942/960/972/1948/3037/3552/3566/3569/3575/3593/3655/3716/3932/3956/4680/5295/5329/5879/6366/6403/7070/7082/8808/9466/10211/10288/10563/10630/10859/25930/26191/29851/50848/64926/79576
BP	GO:0008380	RNA splicing	62	3.5e-05	0.00779563	1153/1207/1660/1994/2521/3185/3303/4154/4928/5094/5295/5433/5518/5546/6429/6433/6638/7072/7536/7919/8106/8148/8220/8458/8882/9128/9410/9584/9785/10084/10181/10450/10465/10521/10929/11218/11325/22913/22927/23020/23398/23524/51319/51362/54957/55119/55234/55596/55677/55692/55702/56339/79026/79753/81608/83759/84811/84967/96764/113146/283742/494115
BP	GO:0002831	regulation of response to biotic stimulus	54	4.12e-05	0.00884736	101/331/948/1378/1660/2219/2268/3055/3140/3326/3593/3659/3716/4057/4277/4282/5094/5591/5690/5691/5695/5696/5702/5709/5710/5716/5719/6372/6772/6885/7804/8807/9021/9447/9782/10084/10623/10859/10906/11140/11326/23643/23705/25942/26191/26253/29997/55703/56253/56339/56833/57103/80149/197358
BP	GO:0007051	spindle organization	30	4.54e-05	0.00927259	331/387/546/1739/3303/5347/5518/6790/6867/7175/7272/7283/7430/9055/9493/9639/9700/9793/10403/10615/10735/10783/23015/24137/25777/55142/57132/57562/79441/259266
BP	GO:0050863	regulation of T cell activation	46	4.64e-05	0.00927259	100/101/207/387/604/914/920/942/972/1209/1378/1739/1948/2615/3552/3566/3569/3575/3593/3620/3659/3932/3956/5295/5879/6366/6385/7070/8456/8808/9466/10288/10859/11326/23240/23513/26191/29851/53833/56253/56339/64926/79576/80149/84695/149041
BP	GO:0072331	signal transduction by p53 class mediator	39	5.39e-05	0.0104204	207/546/602/641/960/972/983/1020/1111/1457/4194/4282/4487/4839/5300/5716/5810/5884/5928/5934/6790/6882/7027/7157/8148/9125/9156/9349/9891/10524/11198/26013/26471/28984/29997/55702/64782/79733/161742
BP	GO:0007159	leukocyte cell-cell adhesion	49	5.63e-05	0.0105257	100/101/207/387/604/920/942/960/972/1739/1948/2615/3037/3552/3566/3569/3575/3593/3620/3659/3932/3956/5295/5879/6366/6385/6402/6403/7070/7430/8808/9466/10288/10507/10859/11326/23240/23513/26191/29851/50848/53833/56253/64926/79576/80149/84695/149041/375056
BP	GO:0045088	regulation of innate immune response	43	6.28e-05	0.0113705	101/331/1378/1660/2219/2268/3055/3326/3593/3659/3716/5591/5690/5691/5695/5696/5702/5709/5710/5716/5719/6772/6885/7804/8807/9021/9447/9782/10084/10623/10859/10906/11140/11326/23705/25942/26191/26253/55703/56253/56339/56833/197358
BP	GO:1901988	negative regulation of cell cycle phase transition	39	6.91e-05	0.0121405	641/701/983/1111/3275/4194/5347/5591/5690/5691/5695/5696/5702/5709/5710/5716/5719/5884/5934/6790/7027/7157/7175/7272/7465/9125/9319/9344/9555/10403/28984/29086/29997/51347/51514/51720/79733/79791/81620
BP	GO:1903037	regulation of leukocyte cell-cell adhesion	45	7.62e-05	0.0129909	100/101/207/387/604/920/942/960/972/1739/1948/2615/3037/3552/3566/3569/3575/3593/3620/3659/3932/3956/5295/5879/6366/6385/6403/7070/8808/9466/10288/10859/11326/23240/23513/26191/29851/53833/56253/64926/79576/80149/84695/149041/375056
BP	GO:0010948	negative regulation of cell cycle process	48	7.91e-05	0.0130887	546/604/641/701/983/1025/1111/3275/3326/4194/4282/5347/5591/5690/5691/5695/5696/5702/5709/5710/5716/5719/5810/5884/5928/5934/6790/7027/7157/7175/7272/7465/9125/9319/9344/9349/9555/9700/10403/28984/29086/29997/51347/51514/51720/79733/79791/81620
BP	GO:1901796	regulation of signal transduction by p53 class mediator	29	8.32e-05	0.0133931	207/641/960/972/1020/1111/1457/4194/4282/4487/4839/5300/5716/5810/5884/5928/6790/6882/7157/8148/9156/9349/9891/10524/11198/26013/29997/55702/161742
BP	GO:0006260	DNA replication	39	8.81e-05	0.0136047	546/604/641/983/1025/1111/1660/3981/4171/4174/4175/4678/4784/5518/5763/5810/5879/5884/5928/7126/7157/8882/9156/9837/10524/10721/10926/11198/23244/25942/30968/51514/55388/56655/57695/79733/81620/253461/254394
BP	GO:0045930	negative regulation of mitotic cell cycle	46	8.92e-05	0.0136047	546/604/641/701/983/1111/1739/3275/4194/5347/5546/5591/5690/5691/5695/5696/5702/5709/5710/5716/5719/5884/5934/6790/7027/7157/7175/7272/7465/7508/9125/9319/9344/9587/10403/23513/28984/29997/51347/64848/64858/64859/79733/79791/81620/220042
BP	GO:0050707	regulation of cytokine secretion	14	9.71e-05	0.0144345	929/947/2268/2615/3552/4282/5552/7096/23601/23705/24145/26253/28984/56253
BP	GO:0032496	response to lipopolysaccharide	45	0.000109009	0.0157927	207/387/623/728/841/929/942/948/1268/1594/2241/2919/2950/3055/3552/3569/3587/3593/3620/3627/4057/4282/4283/4360/4793/5473/5972/6372/6403/7056/7431/8106/9590/10288/10563/10859/11009/23643/26191/55122/63826/79155/79931/80149/148022
BP	GO:0007249	I-kappaB kinase/NF-kappaB signaling	40	0.000115067	0.0158765	207/387/602/825/841/920/929/948/972/1893/2950/3956/4057/5494/5966/6095/6284/6366/6772/6885/7706/8717/8837/10771/10783/11043/23643/51495/54503/55504/57153/79155/79753/79931/80149/81603/84336/84851/148022/197358
BP	GO:0140014	mitotic nuclear division	40	0.000115067	0.0158765	331/387/546/701/983/1111/3303/3552/4041/4288/5300/5347/5518/6790/7175/7272/7283/9055/9319/9493/9555/9587/9639/9700/10403/10615/10735/10783/23244/23310/24137/25836/26013/28984/54820/57132/80218/81620/283489/286053
BP	GO:0002360	T cell lineage commitment	9	0.000144169	0.0194293	387/3569/3593/4063/5591/6778/7157/8456/84695
BP	GO:1904951	positive regulation of establishment of protein localization	48	0.000164931	0.020854	18/101/283/637/841/929/945/947/983/1020/1736/2268/2752/3326/3552/3569/3684/4282/4628/4946/4947/5295/5494/5879/7027/7157/7175/7430/8447/8882/9662/10055/10802/23086/23400/23601/23705/24145/25930/26253/28984/51024/54471/55741/56253/79778/80149/125170
BP	GO:0050821	protein stabilization	29	0.000165424	0.020854	1385/1500/2776/3303/3326/4194/4487/5295/5300/5479/6789/6812/7157/7305/8575/9026/9349/10211/11140/23032/25764/29997/56926/64321/66036/79155/80155/91949/124997
BP	GO:0019216	regulation of lipid metabolic process	54	0.000165537	0.020854	207/211/427/552/585/948/972/1268/1385/1594/1609/2053/2222/2224/2268/2954/3398/4199/5140/5165/5295/5447/5934/6095/6366/6713/7536/8648/8721/9021/9555/10654/11010/11160/11218/23533/25942/29841/30968/50487/57406/66036/80205/83752/84879/96764/124997/125981/145264/157506/221395/339559/376497/768239
BP	GO:0007162	negative regulation of cell adhesion	41	0.00017043	0.0210137	18/207/387/396/604/942/972/1739/2615/3371/3557/3566/3620/3659/3956/5140/5295/5607/6366/6385/6695/9448/10019/10288/10507/10859/11326/23240/23513/26191/28984/53833/56253/56339/57669/80139/80149/84695/140706/149041/375056
BP	GO:0000086	G2/M transition of mitotic cell cycle	36	0.000189506	0.0228789	641/983/1781/3161/5087/5347/5518/5690/5691/5695/5696/5702/5709/5710/5716/5719/5884/6790/7164/7283/7465/8636/9344/9662/9793/10142/10806/22897/22995/25942/29997/51347/51514/54820/55142/79441
BP	GO:2001020	regulation of response to DNA damage stimulus	33	0.000197022	0.0229832	637/960/972/1025/1111/1407/1660/2140/2521/4255/4282/4487/4968/5531/5591/5716/7157/7336/7919/8451/10097/10635/10721/29072/29086/51720/55100/55702/57103/84501/161742/196528/220042
BP	GO:0000212	meiotic spindle organization	6	0.000198302	0.0229832	546/5518/6790/7283/9700/259266
BP	GO:0050792	regulation of viral process	32	0.000203575	0.0230743	920/972/1025/1072/1660/2219/3956/4057/5034/5433/5479/5586/5702/5806/6355/6772/6882/7706/8815/9582/10450/10465/11043/11267/25833/51495/51773/64848/80149/81603/84875/200315
BP	GO:0071222	cellular response to lipopolysaccharide	31	0.000209514	0.0230743	207/387/929/942/948/2919/2950/3055/3552/3569/3593/3627/4057/4282/4283/4360/4793/5473/6372/7431/8106/10288/10563/10859/11009/23643/26191/79155/79931/80149/148022
BP	GO:1902622	regulation of neutrophil migration	11	0.000211033	0.0230743	101/391/719/728/972/5879/6366/7499/8291/56833/158747
BP	GO:0051222	positive regulation of protein transport	46	0.000215123	0.0230858	18/101/283/637/841/929/945/947/983/1020/2268/2752/3326/3552/3569/3684/4282/4628/4946/4947/5295/5494/5879/7027/7157/7175/7430/8447/8882/10055/10802/23086/23400/23601/23705/24145/25930/26253/28984/51024/54471/55741/56253/79778/80149/125170
BP	GO:0043547	positive regulation of GTPase activity	51	0.000233047	0.0240398	391/396/1122/1123/2776/3655/3993/4649/5300/5922/5996/5997/6355/6364/6366/7070/8301/8826/9411/9448/9639/9744/10507/10563/23061/23513/23526/50848/51495/51520/51735/55296/55633/55635/55789/57148/57186/60626/64333/64926/79822/84220/84986/93627/93663/116983/134957/201176/253959/285190/653489
BP	GO:1903038	negative regulation of leukocyte cell-cell adhesion	23	0.000234946	0.0240398	207/604/942/972/1739/2615/3566/3620/3659/6366/6385/10288/10859/11326/23240/23513/26191/53833/56253/80149/84695/149041/375056
BP	GO:0031572	G2 DNA damage checkpoint	10	0.000241157	0.0240398	641/983/1111/5347/9344/29086/29997/51347/51514/51720
BP	GO:0046631	alpha-beta T cell activation	24	0.000241402	0.0240398	100/387/602/604/942/3566/3569/3593/3659/3702/4063/6095/6304/6778/10312/10859/26191/30968/56253/64926/79576/80149/84695/149041
BP	GO:0002237	response to molecule of bacterial origin	46	0.000244754	0.0240398	207/387/623/728/841/929/942/948/1268/1594/2241/2919/2950/3055/3552/3569/3587/3593/3620/3627/4057/4282/4283/4360/4793/5473/5972/6372/6403/7056/7096/7431/8106/9590/10288/10563/10859/11009/23643/26191/55122/63826/79155/79931/80149/148022
BP	GO:0034110	regulation of homotypic cell-cell adhesion	9	0.000260195	0.0251305	18/3716/3956/5329/10019/10630/50848/80139/140706
BP	GO:0002685	regulation of leukocyte migration	31	0.00029544	0.0268974	100/101/207/387/391/623/719/728/972/1652/1893/3569/3627/4282/5764/5879/6355/6364/6366/6403/7070/7499/7941/8291/9466/10563/51157/56833/57509/158747/375056
BP	GO:0043903	regulation of symbiotic process	33	0.000297013	0.0268974	920/972/1025/1072/1660/2219/3956/4057/5034/5433/5479/5586/5702/5806/6355/6372/6772/6882/7706/8815/9582/10450/10465/11043/11267/25833/51495/51773/64848/80149/81603/84875/200315
BP	GO:1990266	neutrophil migration	21	0.000303681	0.0268974	101/391/719/728/972/2919/3627/4283/5473/5479/5879/6355/6364/6366/6372/7499/8291/10563/56833/120425/158747
BP	GO:0072401	signal transduction involved in DNA integrity checkpoint	15	0.000308877	0.0268974	983/1111/4194/5347/5591/5934/6790/7027/7157/9125/28984/29086/51514/51720/79733
BP	GO:0072422	signal transduction involved in DNA damage checkpoint	15	0.000308877	0.0268974	983/1111/4194/5347/5591/5934/6790/7027/7157/9125/28984/29086/51514/51720/79733
BP	GO:0071219	cellular response to molecule of bacterial origin	32	0.000309423	0.0268974	207/387/929/942/948/2919/2950/3055/3552/3569/3593/3627/4057/4282/4283/4360/4793/5473/6372/7096/7431/8106/10288/10563/10859/11009/23643/26191/79155/79931/80149/148022
BP	GO:0002683	negative regulation of immune system process	56	0.000314891	0.0268974	100/207/604/714/942/972/1268/1378/1652/1739/1831/1997/2200/2241/2268/2615/3398/3566/3575/3593/3620/3659/4057/4277/4282/5094/5295/5591/6366/6385/6778/7070/7305/7430/8451/9466/9935/10288/10859/10906/11326/23240/23513/26191/53833/55365/56253/56339/56833/64092/80149/84695/149041/197358/221395/375056
BP	GO:1902105	regulation of leukocyte differentiation	39	0.00031562	0.0268974	100/101/387/604/714/841/914/920/942/972/1209/1378/1385/2200/3398/3552/3566/3575/3593/3659/4057/5295/5591/7305/8451/8456/8808/9935/10288/10859/23240/55365/56253/56339/56833/79576/80149/84695/149041
BP	GO:0043122	regulation of I-kappaB kinase/NF-kappaB signaling	35	0.000341442	0.0279353	207/387/825/841/920/948/972/1893/2950/3956/4057/5494/5966/6095/6284/6366/6772/6885/7706/8717/8837/10771/10783/11043/54503/55504/57153/79155/79931/80149/81603/84336/84851/148022/197358
BP	GO:0002828	regulation of type 2 immune response	9	0.000342261	0.0279353	604/942/972/1893/3566/3569/3620/6778/9466
BP	GO:1902624	positive regulation of neutrophil migration	9	0.000342261	0.0279353	101/719/728/972/5879/6366/7499/8291/158747
BP	GO:0072395	signal transduction involved in cell cycle checkpoint	15	0.000360758	0.0289599	983/1111/4194/5347/5591/5934/6790/7027/7157/9125/28984/29086/51514/51720/79733
BP	GO:0045580	regulation of T cell differentiation	24	0.00036521	0.0289599	100/101/387/604/914/942/972/1209/1378/3552/3566/3575/3593/3659/8456/8808/10288/23240/56253/56339/79576/80149/84695/149041
BP	GO:0032535	regulation of cellular component size	48	0.000369807	0.0289599	120/207/387/585/1020/1072/1207/1385/1739/2241/3055/3326/3575/4131/5341/5868/5879/6259/6366/7430/8301/9026/10093/10097/10163/10505/10507/10723/11078/11267/23400/25942/29882/51474/51520/55971/56996/57180/57521/57715/79822/80031/81553/84501/84561/93663/148170/389541
BP	GO:0030330	DNA damage response, signal transduction by p53 class mediator	19	0.000385312	0.0297718	546/602/960/972/983/4194/4282/4487/5716/5934/6790/7027/7157/9125/10524/28984/55702/79733/161742
BP	GO:1903311	regulation of mRNA metabolic process	44	0.000411907	0.0314079	207/1025/1153/1660/1981/1994/2521/3303/4154/4928/5690/5691/5695/5696/5702/5709/5710/5716/5719/6429/6433/7072/7431/7514/7536/8106/8148/8531/9584/10181/10521/10929/11052/55234/55677/56339/79048/79810/80149/83759/149041/340152/340719/494115
BP	GO:0050866	negative regulation of cell activation	30	0.000427846	0.0321996	18/604/942/972/1268/1739/2241/2268/2615/3398/3566/3620/3659/6385/7056/7305/10019/10288/10859/11326/23240/23513/26191/53833/56253/64092/80149/84695/149041/221395
BP	GO:0034138	toll-like receptor 3 signaling pathway	7	0.000445537	0.0327647	841/10211/23180/26191/57590/79155/148022
BP	GO:0071216	cellular response to biotic stimulus	34	0.000450868	0.0327647	207/387/929/942/948/2919/2950/3055/3552/3569/3593/3627/4057/4282/4283/4360/4793/5473/6372/7096/7157/7431/8106/10288/10563/10859/11009/23643/26191/57103/79155/79931/80149/148022
BP	GO:0045785	positive regulation of cell adhesion	52	0.000456038	0.0327647	100/101/207/387/604/920/942/948/960/972/1948/3037/3552/3566/3569/3575/3593/3655/3716/3932/3956/4680/5034/5295/5329/5764/5879/6366/6385/6403/6789/7070/7082/8291/8808/8826/9448/9466/9806/10211/10288/10563/10630/10859/11078/25930/26191/29851/50848/57669/64926/79576
BP	GO:0071692	protein localization to extracellular region	56	0.00045797	0.0327647	18/101/283/406/929/945/947/1268/2200/2268/2615/2752/3552/3557/3569/3593/3709/3937/3993/4041/4282/4628/5127/5341/5552/5879/6284/7021/7096/7260/7430/8291/8447/9727/10312/10802/10961/11119/23086/23400/23568/23601/23705/24145/25930/26253/28984/55088/55585/56253/79158/91355/93145/134957/285381/375056
BP	GO:0042092	type 2 immune response	10	0.000489835	0.0343214	602/604/942/972/1893/3566/3569/3620/6778/9466
BP	GO:1902850	microtubule cytoskeleton organization involved in mitosis	23	0.000491575	0.0343214	331/387/3303/5347/6790/6867/7175/7272/7283/9055/9493/9639/9700/9793/10403/10735/24137/25777/29072/54820/57132/57562/89958
BP	GO:0045619	regulation of lymphocyte differentiation	27	0.000513581	0.0350609	100/101/387/604/914/942/972/1209/1378/3398/3552/3566/3575/3593/3659/5591/8456/8808/10288/23240/56253/56339/56833/79576/80149/84695/149041
BP	GO:0050868	negative regulation of T cell activation	20	0.000514266	0.0350609	604/942/972/1739/2615/3566/3620/3659/6385/10288/10859/11326/23240/23513/26191/53833/56253/80149/84695/149041
BP	GO:0009306	protein secretion	55	0.000523191	0.0352545	18/101/283/406/929/945/947/1268/2268/2615/2752/3552/3557/3569/3593/3709/3937/3993/4041/4282/4628/5127/5341/5552/5879/6284/7021/7096/7260/7430/8291/8447/9727/10312/10802/10961/11119/23086/23400/23568/23601/23705/24145/25930/26253/28984/55088/55585/56253/79158/91355/93145/134957/285381/375056
BP	GO:0032606	type I interferon production	21	0.000530539	0.0353388	929/1660/3659/5094/5300/5591/5966/6772/6778/7528/7706/10084/10146/10211/10623/10859/26191/29072/55703/148022/197358
BP	GO:0051250	negative regulation of lymphocyte activation	24	0.000541628	0.035441	604/942/972/1739/2268/2615/3398/3566/3620/3659/6385/7305/10288/10859/11326/23240/23513/26191/53833/56253/64092/80149/84695/149041
BP	GO:0035592	establishment of protein localization to extracellular region	55	0.00055127	0.035441	18/101/283/406/929/945/947/1268/2268/2615/2752/3552/3557/3569/3593/3709/3937/3993/4041/4282/4628/5127/5341/5552/5879/6284/7021/7096/7260/7430/8291/8447/9727/10312/10802/10961/11119/23086/23400/23568/23601/23705/24145/25930/26253/28984/55088/55585/56253/79158/91355/93145/134957/285381/375056
BP	GO:0000377	RNA splicing, via transesterification reactions with bulged adenosine as nucleophile	48	0.000556537	0.035441	1153/1207/1660/1994/2521/3185/4154/4928/5094/5433/5546/6429/6433/6638/7072/7536/7919/8106/8220/9128/9410/9584/9785/10084/10181/10450/10465/10521/10929/11218/11325/22913/23020/23398/23524/51319/51362/54957/55234/55596/55692/56339/79753/81608/83759/84811/96764/494115
BP	GO:0000398	mRNA splicing, via spliceosome	48	0.000556537	0.035441	1153/1207/1660/1994/2521/3185/4154/4928/5094/5433/5546/6429/6433/6638/7072/7536/7919/8106/8220/9128/9410/9584/9785/10084/10181/10450/10465/10521/10929/11218/11325/22913/23020/23398/23524/51319/51362/54957/55234/55596/55692/56339/79753/81608/83759/84811/96764/494115
BP	GO:0050691	regulation of defense response to virus by host	10	0.000609411	0.0383863	1660/3593/4277/6772/9447/10084/10859/25942/26191/80149
BP	GO:0070664	negative regulation of leukocyte proliferation	16	0.000638349	0.038908	942/1739/2615/2950/3620/6355/6385/7305/10288/10859/11326/23240/23513/53833/56253/149041
BP	GO:0019058	viral life cycle	43	0.000641265	0.038908	920/942/972/983/1378/1508/1948/2219/3303/3326/3956/4057/4360/4928/5034/5045/5094/5479/5586/5806/5868/6355/7175/7514/7706/8815/9582/9818/10450/10465/11043/11267/23279/23601/50848/51495/57132/64848/79023/80149/81603/84875/200315
BP	GO:1901991	negative regulation of mitotic cell cycle phase transition	34	0.000650623	0.038908	641/701/983/3275/4194/5347/5591/5690/5691/5695/5696/5702/5709/5710/5716/5719/5884/5934/6790/7027/7157/7175/7272/7465/9125/9319/9344/10403/28984/29997/51347/79733/79791/81620
BP	GO:0001890	placenta development	24	0.000654929	0.038908	100/207/283/682/841/1508/1594/1747/2709/3326/3880/4311/4693/5764/6789/7262/8061/8648/9021/23493/29072/54583/79733/100506013
BP	GO:0000375	RNA splicing, via transesterification reactions	48	0.000659564	0.038908	1153/1207/1660/1994/2521/3185/4154/4928/5094/5433/5546/6429/6433/6638/7072/7536/7919/8106/8220/9128/9410/9584/9785/10084/10181/10450/10465/10521/10929/11218/11325/22913/23020/23398/23524/51319/51362/54957/55234/55596/55692/56339/79753/81608/83759/84811/96764/494115
BP	GO:0002695	negative regulation of leukocyte activation	27	0.000666082	0.038908	604/942/972/1268/1739/2241/2268/2615/3398/3566/3620/3659/6385/7305/10288/10859/11326/23240/23513/26191/53833/56253/64092/80149/84695/149041/221395
BP	GO:0038061	NIK/NF-kappaB signaling	27	0.000666082	0.038908	207/387/602/929/942/3593/5494/5531/5690/5691/5695/5696/5702/5709/5710/5716/5719/5966/6885/8717/9966/26191/56892/80149/149041/197358/219790
BP	GO:0050708	regulation of protein secretion	44	0.000671407	0.038908	18/101/283/406/929/945/947/1268/2268/2615/2752/3552/3569/3593/3709/3993/4041/4282/4628/5127/5552/5879/7021/7096/7260/7430/8447/9727/10312/10802/10961/23086/23400/23568/23601/23705/24145/25930/26253/28984/56253/91355/134957/285381
BP	GO:0046822	regulation of nucleocytoplasmic transport	19	0.000693881	0.0398123	948/983/1020/1660/3326/5295/5494/5784/7157/7175/7514/8882/9818/11052/29072/51715/55677/64062/80149
BP	GO:0002820	negative regulation of adaptive immune response	11	0.000732645	0.0416243	604/1378/3566/3575/9466/10859/53833/64092/80149/84695/149041
BP	GO:0046831	regulation of RNA export from nucleus	6	0.000759496	0.0427078	1660/7175/11052/29072/55677/64062
BP	GO:0061299	retina vasculature morphogenesis in camera-type eye	5	0.000766456	0.0427078	1282/4041/4693/25932/91355
BP	GO:0045787	positive regulation of cell cycle	48	0.000779226	0.0430058	207/387/546/905/983/1025/1111/1981/3326/3398/3552/4041/4194/4282/4487/5087/5586/5716/5934/6790/7027/7157/7175/7919/8061/8451/9125/9349/9493/9555/9700/10403/10615/10926/25836/25942/26471/28984/51514/57521/64848/79733/81610/81620/81857/84967/151195/286053
BP	GO:0002335	mature B cell differentiation	8	0.000821547	0.0449138	100/602/3569/3956/4242/9452/55846/56833
BP	GO:0050852	T cell receptor signaling pathway	29	0.000850779	0.0455805	100/920/1997/2533/3118/3702/3932/3937/5295/5690/5691/5695/5696/5702/5709/5710/5716/5719/6885/7070/7430/11118/11119/23180/26191/30968/80149/114625/149041
BP	GO:0042130	negative regulation of T cell proliferation	13	0.000855263	0.0455805	942/1739/2615/3620/6385/10288/10859/11326/23240/23513/53833/56253/149041
BP	GO:0002313	mature B cell differentiation involved in immune response	7	0.000857338	0.0455805	100/602/3569/3956/4242/9452/55846
BP	GO:0006282	regulation of DNA repair	21	0.00089216	0.0470006	1025/1111/1660/2140/2521/4255/4968/5531/5591/7336/8451/10097/10635/10721/29072/29086/51720/55100/57103/84501/196528
BP	GO:0043123	positive regulation of I-kappaB kinase/NF-kappaB signaling	27	0.000930146	0.0484831	207/387/841/920/948/972/1893/3956/4057/5494/5966/6284/6366/6885/7706/8717/8837/10783/11043/54503/55504/57153/79155/81603/84336/84851/148022
BP	GO:0046632	alpha-beta T cell differentiation	18	0.000937033	0.0484831	100/387/602/604/942/3566/3569/3593/3659/3702/4063/6095/6304/6778/79576/80149/84695/149041
BP	GO:0002687	positive regulation of leukocyte migration	22	0.000979542	0.0497934	101/387/623/719/728/972/3569/3627/5764/5879/6355/6364/6366/6403/7070/7499/7941/8291/10563/51157/158747/375056
BP	GO:0007292	female gamete generation	22	0.000979542	0.0497934	268/283/3566/4327/5347/5518/5764/5806/5997/6790/7130/7272/8061/9319/11218/24145/64848/79670/84501/254394/259266/340719
BP	GO:0051656	establishment of organelle localization	51	0.000988347	0.0498041	374/585/1020/1075/1739/1759/2241/2268/2647/3566/3797/3993/4131/4628/5347/5870/6284/6812/7430/7514/8301/9493/9700/10097/10128/10312/10403/10615/10802/10947/22906/23095/23243/23513/25777/26985/50487/54820/55088/55201/55330/55341/55717/57132/60412/63971/81610/81620/84501/89958/283489
KEGG_PATHWAY	hsa05202	Transcriptional misregulation in cancer	28	1.8e-06	0.00145772	929/5087/4298/4299/3684/3486/2130/3560/25942/4094/26471/2521/84444/2209/5077/7157/4300/8148/3398/221037/3569/1025/942/4314/604/5546/5966/905
KEGG_PATHWAY	hsa04640	Hematopoietic cell lineage	17	3.1e-06	0.00250889	929/3684/4311/3552/3118/3569/960/1378/3566/3575/920/945/3655/914/947/948/2209
KEGG_PATHWAY	hsa04668	TNF signaling pathway	17	9.93e-06	0.00804091	6372/5295/6364/6885/1385/9021/3569/841/2919/602/207/4314/197259/8837/3627/3659/8717
KEGG_PATHWAY	hsa04630	JAK-STAT signaling pathway	22	1.14e-05	0.00921651	5295/9466/6772/6775/8027/9180/3560/3593/9021/11009/3716/3569/3601/3566/3587/3575/53833/316/207/6655/6778/50615
KEGG_PATHWAY	hsa04512	ECM-receptor interaction	14	1.36e-05	0.0110219	6385/131873/1286/256076/1282/3371/1292/3161/960/3908/1288/1298/3655/948
KEGG_PATHWAY	hsa04659	Th17 cell differentiation	16	1.51e-05	0.0122319	9466/6772/4793/3560/6095/3716/3118/3569/3326/3556/3566/920/4775/6778/3932/50615
KEGG_PATHWAY	hsa04520	Adherens junction	12	1.51e-05	0.0122514	1457/387/83439/1500/283106/10163/6885/1495/2241/7082/5879/8826
KEGG_PATHWAY	hsa04380	Osteoclast differentiation	18	1.6e-05	0.0129203	5295/6772/6885/3552/1385/8061/9021/79168/3716/3937/10859/7305/10990/207/10288/5879/3932/2209
KEGG_PATHWAY	hsa04062	Chemokine signaling pathway	24	2.01e-05	0.0162729	6372/5295/4283/6364/5473/6355/6366/6772/4793/3055/23533/387/2776/157/2268/2773/2919/207/6655/10563/109/5879/3702/3627
KEGG_PATHWAY	hsa04657	IL-17 signaling pathway	14	2.21e-05	0.0178771	6372/6364/6885/8061/3569/3326/1994/841/27189/2919/4312/4314/3627/8717
KEGG_PATHWAY	hsa04620	Toll-like receptor signaling pathway	15	2.27e-05	0.0184023	929/5295/4283/6772/6885/3593/23643/148022/7096/3569/841/942/207/5879/3627
KEGG_PATHWAY	hsa04110	Cell cycle	17	2.65e-05	0.0214971	5591/4174/4175/9700/7465/7157/7027/7272/4171/29882/10735/983/10926/1111/701/5347/5934
KEGG_PATHWAY	hsa04060	Cytokine-cytokine receptor interaction	33	2.86e-05	0.0231261	6372/9466/8793/23529/6355/9180/3560/11009/8808/3557/3556/27189/3575/55504/8807/50615/4283/6364/5473/6366/3552/3593/3569/3601/268/3566/3587/920/53833/2919/10563/9966/3627
KEGG_PATHWAY	hsa00380	Tryptophan metabolism	8	2.9e-05	0.0234889	224/26/3620/501/316/6999/847/3030
KEGG_PATHWAY	hsa04658	Th1 and Th2 cell differentiation	13	3.82e-05	0.0309663	6772/4793/6775/3560/3593/4094/3716/3118/3566/920/4775/6778/3932
KEGG_PATHWAY	hsa04115	p53 signaling pathway	11	3.96e-05	0.03206	4194/92344/983/7157/841/1111/64326/3486/637/3732/25898
KEGG_PATHWAY	hsa03050	Proteasome	8	4.38e-05	0.0354995	5690/5691/5719/5709/5695/5696/5710/5702
KEGG_PATHWAY	hsa00750	Vitamin B6 metabolism	3	4.77e-05	0.0385987	8566/316/493911
KEGG_PATHWAY	hsa04217	Necroptosis	19	5.17e-05	0.0418448	6772/9555/6775/3552/57132/9131/148022/3716/331/2512/3326/2752/841/637/7416/6778/197259/8837/8717
KEGG_PATHWAY	hsa05100	Bacterial invasion of epithelial cells	11	5.28e-05	0.0427396	5295/387/10093/57180/10097/10163/1495/391/5879/4735/1759
KEGG_PATHWAY	hsa05417	Lipid and atherosclerosis	24	5.68e-05	0.0460012	929/5295/51806/22926/7157/6885/3593/25833/23643/148022/387/3569/3326/3303/841/6403/2919/4312/4775/207/4314/637/948/5879
KEGG_PATHWAY	hsa05235	PD-L1 expression and PD-1 checkpoint pathway in cancer	12	5.99e-05	0.0484891	3716/5295/1457/6772/283106/4793/920/4775/207/55509/3932/148022
KEGG_PATHWAY	hsa04621	NOD-like receptor signaling pathway	21	6.04e-05	0.0489621	25828/9447/4671/6772/4793/6885/5586/24145/148022/3716/331/387/3569/3326/841/3709/84557/2919/1508/7416/838

## Sheet: RT-qPCRhuman
		METTL3	GAPDH		ΔCT		ΔΔCT	2^(-ΔΔCT)
P:Psoriasis	P1	30.1473	19.4898	19.3852	10.7622		1.51288	0.350411	0.353582
C:Normal	P1	30.0604	19.3492	19.3852	10.6752		1.42593	0.372179
	P1	30.1987	19.3164	19.3852	10.8135		1.56424	0.338156
	P2	30.3299	20.2838	20.1624	10.1676		0.918271	0.529143	0.441906
	P2	30.9988	20.0005	20.1624	10.8365		1.58719	0.33282
	P2	30.5202	20.2028	20.1624	10.3579		1.10857	0.463754
	C1	32.2303	23.8612	23.5306	8.69973	9.2493	-0.549571	1.46365	1.2711
	C1	32.7626	23.3972	23.5306	9.23197		-0.0173338	1.01209
	C1	32.3603	23.3333	23.5306	8.82969		-0.419615	1.33757
	C2	33.4825	24.2107	24.1059	9.37661		0.127309	0.915537	0.80321
	C2	33.6247	24.0209	24.1059	9.51873		0.269421	0.829652
	C2	33.945	24.0862	24.1059	9.83909		0.589789	0.66444
	P3	30.0392	20.9494	21.1454	8.89379		1.05182	0.482359	0.56542
	P3	29.7887	21.3124	21.1454	8.64334		0.801372	0.573803
	P3	29.631	21.1744	21.1454	8.48561		0.643637	0.640097
	P4	31.0163	20.9226	21.2009	9.81547		1.9735	0.254635	0.225023
	P4	31.4656	21.354	21.2009	10.2647		2.42275	0.1865
	P4	31.1387	21.3259	21.2009	9.9378		2.09583	0.233933
	C3	31.0426	23.3292	23.6255	7.41712	7.84197	-0.424855	1.34244	1.21384
	C3	31.3195	23.8222	23.6255	7.69394		-0.148035	1.10806
	C3	31.2153	23.7252	23.6255	7.58978		-0.252187	1.19101
	C4	32.5483	24.2341	24.4791	8.06913		0.22716	0.854315	0.826802
	C4	32.6526	24.6592	24.4791	8.17344		0.331467	0.794728
	C4	32.5875	24.5441	24.4791	8.10842		0.266449	0.831363
	P5	27.3447	18.5167	18.5419	8.80279		1.83875	0.279563	0.265791
	P5	27.2514	18.5857	18.5419	8.70954		1.74549	0.298232
	P5	27.6931	18.5232	18.5419	9.15124		2.1872	0.219577
	P6	31.4502	20.5662	20.747	10.7033		3.73921	0.0748832	0.0800298
	P6	31.189	20.9309	20.747	10.4421		3.47805	0.0897434
	P6	31.4391	20.7438	20.747	10.6921		3.72809	0.0754627
	C5	31.5064	24.2554	24.5748	6.93161	6.96404	-0.0324337	1.02274	0.844329
	C5	32.1203	24.687	24.5748	7.54551		0.58147	0.668282
	C5	31.787	24.7819	24.5748	7.21221		0.248164	0.841967
	C6	30.0566	23.1313	23.3857	6.67088		-0.293163	1.22532	1.20274
	C6	30.1429	23.4821	23.3857	6.75717		-0.206872	1.15418
	C6	30.0526	23.5438	23.3857	6.66688		-0.297166	1.22873
		YTHDC2	GAPDH		ΔCT		ΔΔCT	2^(-ΔΔCT)
	P1	28.4129	19.6108	19.6068	8.80613		-4.0617	16.6991	18.0721
	P1	28.1386	19.5065	19.6068	8.53181		-4.33602	20.1964
	P1	28.3602	19.7031	19.6068	8.75341		-4.11442	17.3207
	P2	25.8978	19.102	18.651	7.24677		-5.62106	49.2163	43.9335
	P2	26.0445	18.5469	18.651	7.39349		-5.47435	44.4573
	P2	26.2661	18.3043	18.651	7.61509		-5.25274	38.127
	C1	36.2782	23.217	23.1448	13.1334	12.8678	0.265542	0.831886	0.806038
	C1	36.1975	23.1881	23.1448	13.0527		0.184847	0.879742
	C1	36.5139	23.0292	23.1448	13.3691		0.501268	0.706486
	C2	36.4759	24.0563	23.8371	12.6388		-0.22904	1.17205	1.24946
	C2	36.4512	23.8228	23.8371	12.6141		-0.253768	1.19232
	C2	36.2361	23.6322	23.8371	12.399		-0.46885	1.38401
	P3	28.017	22.1685	22.0776	5.93944		-4.47807	22.286	18.6842
	P3	28.4657	21.9867	22.0776	6.3881		-4.02941	16.3295
	P3	28.371	22.0776	22.0776	6.29342		-4.12409	17.4371
	P4	25.4526	18.4087	18.5648	6.88782		-3.52969	11.5489	12.5812
	P4	25.3631	18.6063	18.5648	6.79829		-3.61921	12.2883
	P4	25.1846	18.6795	18.5648	6.61982		-3.79769	13.9065
	C3	33.7485	23.6972	23.6935	10.055	10.4175	-0.362509	1.28566	1.24527
	C3	33.7641	23.7925	23.6935	10.0706		-0.346906	1.27183
	C3	33.8743	23.5909	23.6935	10.1808		-0.236721	1.17831
	C4	34.9598	24.1674	24.2904	10.6694		0.251897	0.839792	0.804101
	C4	35.0317	24.3282	24.2904	10.7412		0.323728	0.799003
	C4	35.0784	24.3757	24.2904	10.788		0.370511	0.773509
	P5	25.6113	18.5167	18.5419	7.06942		-3.91459	15.0803	15.5386
	P5	25.8188	18.5857	18.5419	7.27696		-3.70706	13.0598
	P5	25.3183	18.5232	18.5419	6.77646		-4.20756	18.4757
	P6	26.456	20.5662	20.747	5.70902		-5.275	38.7197	33.0052
	P6	26.9033	20.9309	20.747	6.1563		-4.82772	28.3981
	P6	26.7356	20.7438	20.747	5.98863		-4.99539	31.8979
	C5	34.9966	24.2554	24.5748	10.4219	10.984	-0.562153	1.47647	1.12818
	C5	35.6206	24.687	24.5748	11.0459		0.0618565	0.95803
	C5	35.6327	24.7819	24.5748	11.0579		0.0739291	0.950047
	C6	34.436	23.1313	23.3857	11.0502		0.0662322	0.955129	0.90698
	C6	34.5159	23.4821	23.3857	11.1302		0.146153	0.903657
	C6	34.5837	23.5438	23.3857	11.198		0.213982	0.862154
		IGF2BP2	GAPDH		ΔCT		ΔΔCT	2^(-ΔΔCT)
	P1	30.1783	19.6108	19.6068	10.5715		5.17296	0.0277194	0.0265281
	P1	30.193	19.5065	19.6068	10.5862		5.18761	0.0274394
	P1	30.3608	19.7031	19.6068	10.754		5.35547	0.0244255
	P2	29.3736	19.102	18.651	10.7226		5.324	0.0249641	0.0258283
	P2	29.2156	18.5469	18.651	10.5646		5.16604	0.0278527
	P2	29.3908	18.3043	18.651	10.7398		5.34121	0.0246681
	C1	28.6271	23.217	23.1448	5.48236	5.39857	0.083794	0.943573	1.02798
	C1	28.2341	23.1881	23.1448	5.0893		-0.309268	1.23908
	C1	28.6933	23.0292	23.1448	5.54851		0.149939	0.901289
	C2	27.5896	22.2798	22.2786	5.31096		-0.0876087	1.06261	0.984394
	C2	27.7926	22.1481	22.2786	5.51397		0.115401	0.923126
	C2	27.7249	22.4079	22.2786	5.44631		0.0477434	0.967448
	P3	31.2982	22.1685	22.0776	9.22061		1.31246	0.402633	0.346994
	P3	31.8736	21.9867	22.0776	9.79603		1.88789	0.270202
	P3	31.4274	22.0776	22.0776	9.34979		1.44164	0.368148
	P4	29.2237	18.4087	18.5648	10.6589		2.75078	0.148571	0.135178
	P4	29.4171	18.6063	18.5648	10.8523		2.94417	0.129932
	P4	29.4497	18.6795	18.5648	10.8849		2.97675	0.127031
	C3	31.4824	23.6972	23.6935	7.78884	7.90814	-0.119302	1.08621	1.00176
	C3	31.7692	23.7925	23.6935	8.07571		0.167564	0.890344
	C3	31.5608	23.5909	23.6935	7.86727		-0.0408724	1.02874
	C4	32.298	24.1674	24.2904	8.00761		0.0994667	0.933378	1.00575
	C4	32.0153	24.3282	24.2904	7.72489		-0.183251	1.13544
	C4	32.275	24.3757	24.2904	7.98454		0.0763951	0.948425
	P5	30.481	19.9344	19.9246	10.5564		3.82429	0.0705948	0.0678172
	P5	29.5905	20.0156	19.9246	9.6659		2.9338	0.130869
	P5	35.6313	19.8238	19.9246	15.7067		8.97456	0.00198787
	P6	29.1664	20.0659	20.1843	8.98215		2.25005	0.210216	0.1844
	P6	29.7066	20.3753	20.1843	9.52232		2.79022	0.144564
	P6	29.2497	20.1117	20.1843	9.06547		2.33338	0.198419
	C5	31.9458	24.1562	24.6188	7.32701	6.73209	0.594913	0.662084	0.860531
	C5	31.3529	24.964	24.6188	6.73419		0.00209574	0.998548
	C5	31.4696	24.7361	24.6188	6.85088		0.118791	0.920959
	C6	30.3094	24.4413	24.2048	6.10464		-0.627451	1.54483	1.22556
	C6	30.5187	24.163	24.2048	6.31395		-0.418139	1.3362
	C6	31.2666	24.01	24.2048	7.06188		0.329791	0.795652

## Sheet: RT-qPCRanimal
		METTL3	GAPDH		ΔCT		ΔΔCT	2^(-ΔΔCT)
P:IMQ	P1	32.4187	18.142	18.0115	14.4072		1.81771	0.283672	0.302328
C:Control	P1	32.658	17.957	18.0115	14.6464		2.05698	0.240318
	P1	32.1952	17.9356	18.0115	14.1837		1.59422	0.331201
	P2	32.5001	18.5381	18.3109	14.1892		1.59971	0.329944	0.319593
	P2	32.8426	18.1584	18.3109	14.5317		1.94228	0.260206
	P2	32.3401	18.2363	18.3109	14.0292		1.43975	0.36863
	C1	33.1191	21.0893	20.9191	12.2	12.5894	-0.389448	1.30989	1.01347
	C1	33.5317	20.6749	20.9191	12.6126		0.023152	0.98408
	C1	33.3118	20.993	20.9191	12.3927		-0.196745	1.14611
	C2	33.6864	20.8743	20.7863	12.9001		0.310638	0.806285	0.880244
	C2	33.4352	20.7469	20.7863	12.6489		0.0594054	0.95966
	C2	33.5688	20.7378	20.7863	12.7824		0.192998	0.874786
	P3	29.0534	16.1881	16.0268	13.0266		1.26991	0.414686	0.403871
	P3	29.2216	15.8742	16.0268	13.1948		1.43816	0.369037
	P3	29.0082	16.018	16.0268	12.9814		1.22469	0.427889
	P4	31.7686	18.3529	18.5485	13.22		1.46334	0.362652	0.311734
	P4	32.0898	18.5556	18.5485	13.5413		1.78457	0.290262
	P4	32.13	18.7371	18.5485	13.5814		1.82476	0.282287
	C3	32.2981	20.3823	20.3407	11.9574	11.7567	0.200757	0.870094	0.941669
	C3	32.0892	20.5407	20.3407	11.7485		-0.00813553	1.00566
	C3	32.1725	20.099	20.3407	11.8318		0.0751276	0.949258
	C4	31.4385	19.686	19.864	11.5745		-0.18214	1.13457	1.07468
	C4	31.8206	20.0976	19.864	11.9566		0.199953	0.870579
	C4	31.3351	19.8083	19.864	11.4711		-0.285562	1.21888
	P5	32.3868	19.7151	19.4486	12.9382		0.377105	0.769981	0.699151
	P5	32.4235	19.3513	19.4486	12.9749		0.413788	0.75065
	P5	32.8035	19.2794	19.4486	13.3549		0.793798	0.576823
	C5	30.5839	17.9025	17.9401	12.6438	12.5611	0.0826865	0.944298	1.01005
	C5	30.6964	17.967	17.9401	12.7562		0.195139	0.873489
	C5	30.2234	17.9509	17.9401	12.2833		-0.277825	1.21237
		YTHDC2	GAPDH		ΔCT		ΔΔCT	2^(-ΔΔCT)
	P1	30.3839	18.142	18.0115	12.3723		-3.51591	11.4392	10.8083
	P1	30.1083	17.957	18.0115	12.0968		-3.79148	13.8468
	P1	30.5047	17.9356	18.0115	12.4931		-3.39512	10.5204
	P2	31.0257	18.5381	18.3109	12.7148		-3.17349	9.02228	9.68108
	P2	30.7656	18.1584	18.3109	12.4547		-3.43355	10.8044
	P2	30.9949	18.2363	18.3109	12.684		-3.20423	9.21656
	C1	36.4849	21.0893	20.9191	15.5658	15.8882	-0.322434	1.25044	1.01012
	C1	36.6488	20.6749	20.9191	15.7298		-0.158465	1.1161
	C1	36.9078	20.993	20.9191	15.9888		0.100538	0.932685
	C2	36.867	20.8743	20.7863	16.0807		0.192443	0.875122	0.920498
	C2	36.9349	20.7469	20.7863	16.1486		0.260328	0.834898
	C2	36.6022	20.7378	20.7863	15.8158		-0.0724107	1.05147
	P3	30.2803	16.1881	16.0268	14.2535		-1.27375	2.41789	3.11018
	P3	29.903	15.8742	16.0268	13.8762		-1.65103	3.14057
	P3	29.6387	16.018	16.0268	13.6119		-1.91535	3.77206
	P4	31.1616	18.3529	18.5485	12.6131		-2.91415	7.53781	8.54702
	P4	31.1095	18.5556	18.5485	12.561		-2.96623	7.81491
	P4	30.7128	18.7371	18.5485	12.1643		-3.36294	10.2883
	C3	35.9761	20.3823	20.3407	15.6354	15.5272	0.108131	0.927789	1.12336
	C3	35.9483	20.5407	20.3407	15.6076		0.0803697	0.945815
	C3	35.2864	20.099	20.3407	14.9457		-0.581565	1.49647
	C4	35.1784	19.686	19.864	15.3145		-0.212773	1.15891	0.934716
	C4	35.4461	20.0976	19.864	15.5822		0.0549146	0.962651
	C4	35.9421	19.8083	19.864	16.0782		0.550922	0.682584
	P5	33.9803	19.7151	19.4486	14.5316		-2.59847	6.05645	6.70689
	P5	33.903	19.3513	19.4486	14.4544		-2.67575	6.38971
	P5	33.6387	19.2794	19.4486	14.19		-2.94008	7.67452
	C5	34.9761	17.9025	17.9401	17.0359	17.1301	-0.0941806	1.06746	1.00551
	C5	34.9483	17.967	17.9401	17.0082		-0.121942	1.0882
	C5	35.2864	17.9509	17.9401	17.3462		0.216123	0.860876
		IGF2BP2	GAPDH		ΔCT		ΔΔCT	2^(-ΔΔCT)
	P1	32.5057	18.142	18.0115	14.4942		0.821604	0.565812	0.602827
	P1	32.5751	17.957	18.0115	14.5635		0.890937	0.539264
	P1	32.334	17.9356	18.0115	14.3225		0.649858	0.637343
	P2	32.6329	18.5381	18.3109	14.322		0.649429	0.637533	0.624848
	P2	32.6579	18.1584	18.3109	14.347		0.674348	0.626615
	P2	32.6957	18.2363	18.3109	14.3848		0.71218	0.610397
	C1	34.773	21.0893	20.9191	13.854	13.6726	0.181382	0.881858	1.011
	C1	34.5936	20.6749	20.9191	13.6746		0.00198694	0.998624
	C1	34.2041	20.993	20.9191	13.285		-0.387603	1.30822
	C2	34.3199	20.8743	20.7863	13.5336		-0.138993	1.10114	0.959102
	C2	34.6638	20.7469	20.7863	13.8774		0.204844	0.867632
	C2	34.5973	20.7378	20.7863	13.811		0.138382	0.908537
	P3	31.9985	16.1881	16.0268	15.9717		1.57837	0.334861	0.433645
	P3	32.1942	15.8742	16.0268	16.1674		1.77407	0.292382
	P3	31.9843	16.018	16.0268	15.9575		1.56414	0.33818
	P4	33.7598	18.3529	18.5485	15.2113		0.817931	0.567255	0.545482
	P4	33.8992	18.5556	18.5485	15.3506		0.957277	0.515028
	P4	33.7935	18.7371	18.5485	15.245		0.851618	0.554163
	C3	34.1579	20.3823	20.3407	13.8172	14.3933	-0.576184	1.4909	1.07127
	C3	34.4573	20.5407	20.3407	14.1166		-0.276738	1.21145
	C3	34.0272	20.099	20.3407	13.6865		-0.706858	1.63225
	C4	34.8274	19.686	19.864	14.9635		0.570101	0.673569	0.697677
	C4	34.7751	20.0976	19.864	14.9112		0.517807	0.698433
	C4	34.7292	19.8083	19.864	14.8652		0.471873	0.721028
	P5	34.5787	19.7151	19.4486	15.1301		0.499594	0.707306	0.677905
	P5	34.5702	19.3513	19.4486	15.1216		0.491067	0.711499
	P5	34.7807	19.2794	19.4486	15.3321		0.701554	0.614909
	C5	32.4465	17.9025	17.9401	14.5063	14.6305	-0.124172	1.08988	1.0048
	C5	32.7707	17.967	17.9401	14.8306		0.200082	0.870501
	C5	32.4947	17.9509	17.9401	14.5546		-0.0759097	1.05403
